# Rethinking bacterial relationships in light of their molecular abilities

Yannick Mahlich<sup>1\*</sup>, Chengsheng Zhu<sup>1,2</sup>, Henri Chung<sup>3</sup>, Pavan K. Velaga<sup>1</sup>, M. Clara De Paolis Kaluza<sup>4</sup>, Predrag Radivojac<sup>4</sup>, Iddo Friedberg<sup>3</sup>, Yana Bromberg<sup>1,3\*</sup>

## Affiliations

<sup>1</sup> Department of Biochemistry and Microbiology, Rutgers University, 76 Lipman Dr, New Brunswick, NJ 08873, USA.

<sup>2</sup> Xbiome Inc., 1 Broadway, 14th fl, Cambridge, MA 02142, USA.

<sup>3</sup> Interdepartmental program in Bioinformatics and Computational Biology and Department of Veterinary Microbiology and Preventive Medicine, Iowa State University, Ames, IA 50011, USA.

<sup>4</sup> Khoury College of Computer Sciences, Northeastern University, 177 Huntington Avenue, Boston, MA 02115, USA.

\* Corresponding author: [yana@bromberglab.org](mailto:yana@bromberglab.org); [ymahlich@bromberglab.org](mailto:ymahlich@bromberglab.org)

## Abstract

Determining the repertoire of a microbe's molecular functions is a central question in microbial genomics. Modern techniques achieve this goal by comparing microbial genetic material against reference databases of functionally annotated genes/proteins or known taxonomic markers such as 16S rRNA. Here we describe a novel approach to exploring bacterial functional repertoires without reference databases. Our *Fusion* scheme establishes functional relationships between bacteria and thus assigns organisms to Fusion taxa that differ from otherwise defined taxonomic clades. Three key findings of our work stand out. First, Fusion profile comparisons outperform existing functional annotation schemes in recovering taxonomic labels. Second, Fusion-derived functional co-occurrence profiles reflect known metabolic pathways, suggesting a route for discovery of new ones. Finally, our alignment-free nucleic acid-based Siamese Neural Network model, trained using Fusion functions, enables finding shared functionality of very distant, possibly structurally different, microbial homologs. Our work can thus help annotate functional repertoires of bacterial organisms and further guide our understanding of microbial communities.

## Introduction

Exploring the molecular functional capabilities of microbes is key to understanding their lifestyles and contributions to the biogeosphere cycles that run our world(1-6). Microbial communities are often analyzed by taxonomically categorizing their members, defining their functional capabilities, and using this knowledge as a proxy for the community's overall functional abilities(7-10). The gold standard for taxonomic classification of newly sequenced organisms, and reclassification of existing ones, is DNA-DNA hybridization (DDH)(11, 12). DDH can be approximated using 16S rRNA similarity and bacterial morphology and physiology (13-15). More recent approaches analyze genome sequence properties such as average nucleotide identity and multilocus sequence similarity(16-20). These sequence-based methods promise to match DDH's taxonomic precision while being simpler and cheaper.

Notably, the above methods adopt a primarily phylogenetic view of bacterial relationships, assessing microorganisms' likely evolutionary lineage based on genetic

46 similarity. Horizontal gene transfer (HGT), i.e. the exchange of genetic material across  
47 taxonomic lineages, complicates this approach to bacterial classification(21-23). HGT is the  
48 primary way for evolutionarily distant organisms to acquire similar functional capabilities  
49 encoded by similar sequences(24-26). Conversely, evolutionarily close sequence-similar  
50 organisms can functionally diverge under environmental pressure. Given a shift towards  
51 analyzing the functional capabilities of microbes(8, 27-29), i.e. “What are they doing?”  
52 instead of “Who are they?”, one might ask the question “Are these bacteria functionally  
53 related?” as opposed to “Are they evolutionary cousins?” The former question can be  
54 answered well, if incompletely, by phenetic approaches based on, for example, differentiation  
55 of cell wall composition, guanine-cytosine content, and the presence of lipids amongst others  
56 (30, 31). We propose that genome-inferred bacterial functional annotations may further  
57 improve the resolution of these methods.

58 We previously developed Fusion, a method for evaluating microbial similarities based  
59 on shared functionality encoded in their genomes(27, 32). This approach revealed  
60 relationships between organism groups that are overlooked when using taxonomic or DNA  
61 similarity alone. Here, in addition to updating our classification scheme for a faster and more  
62 precise way of dealing with a flood of microbial genomes, we made five key discoveries: (1)  
63 We established that Fusion outperformed other function definitions in reconstituting the  
64 current state-of-the-art bacterial taxonomies (33) (34). Furthermore, using only a few  
65 common Fusion functions was sufficiently descriptive of these taxonomic assignments. (2)  
66 We also found that functional similarity could complement 16S rRNA sequence identity in  
67 assigning taxonomic classification. (3) In light of these findings, we proposed that a  
68 functional similarity-based classification scheme for Prokaryotes may be more robust than  
69 evolution-based taxonomic classifications. (4) We further found that collections of Fusion  
70 functions co-occurring within organisms highlight known metabolic pathways. We note that,  
71 unlike existing techniques (35-38) our approach allows for discovery of novel pathways. (5)  
72 Finally, we trained a Siamese Neural Network (SNN)(39) model to label two gene sequences  
73 as encoding proteins of the same Fusion function. In contrast to function transfer via  
74 sequence-derived homology, we expect that this model will be useful for further  
75 generalization of function concepts. We also note that this approach could potentially be  
76 optimized to label functional profiles of microbial metagenomes directly from sequencing  
77 reads, i.e. without the need of assembly or metagenomic binning(40-43).

78

## 79 **Results & Discussion**

80 **Sequenced bacterial proteomes are significantly redundant.** We retrieved from  
81 GenBank (44, 45) (Methods) a set of 8,906 genomes/proteomes of bacterial organisms  
82 representing 3,005 species. This set comprised all fully sequenced bacterial genomes  
83 available at the time of extraction (2018). It is notably redundant with 65% (5,754) of the  
84 proteomes belonging to only 25% (753) of the species. An extreme case of this observation is  
85 the 360 proteomes of *Bordetella pertussis*, contributing 360 copies of almost every  
86 *B.pertussis* protein (~3,620 proteins per proteome) to our collection. Overall, nearly 60%  
87 (18.8 of 31.6 million) of proteins in our set were identical to others. Of the ~15.6M sequence-  
88 unique proteins in our set (*sequence-unique protein set*, Methods), ~2.8M (~18%) were found  
89 in multiple proteomes, while ~12.8M (82%) were proteome-specific.

90 As expected, much of the sequence redundancy occurred between strains of the same  
91 species, emphasizing the difficulty of distinguishing organism classes. When the set of  
92 organisms was phylogenetically balanced (*balanced organism set*, Methods), much of the  
93 protein redundancy was removed. This collection contained ~4.75 million proteins, of which  
94 99% (~4.69M) were sequence- and organism- unique. We also note that these proteins still  
95 recapitulated nearly two thirds of the functions identified in the complete set of proteins  
96 (Methods). Most of the analyses presented here are based on the balanced organism set.

97 **Fusion reflects and augments known functionality.** We computed functional  
98 pairwise similarities (edges; using HFSP (46), Homology-derived Functional Similarity of  
99 Proteins) between sequence-unique proteins (vertices) and clustered the resulting network to  
100 determine the molecular functions likely carried out by proteins in our set (Methods; Fig. 1).  
101 We obtained 433,891 clusters of functionally similar proteins, dubbed *Fusion functions*,  
102 ranging in size from 2 to 118,984 proteins (Fig. S1).

103 This collection of Fusion functions, particularly the large number of small functions,  
104 i.e. containing few proteins, is contrary to expectations of functional diversity as compared to,  
105 e.g. 19,179 Pfam-A families/clans (Pfam v34, Methods) (47) and 11,185 molecular function  
106 GO terms (GeneOntology version 2021-09-01; Methods) (48, 49). This discrepancy between  
107 the annotations is likely accounted for by functional definitions. Pfam-A, for example, needs  
108 many sequences per family to build multiple sequence alignments (MSAs) for Hidden  
109 Markov Model (HMM) construction; thus, some of our functions may simply have not  
110 contained enough sequences to recapitulate a Pfam family. Furthermore, Pfam domains are  
111 not functionally precise as the same domain is often reused in different functions (50-53) and  
112 one protein can have more than one domain. Of the Fusion functions, only 15% (65,663)  
113 have at least 20 sequence-unique proteins, i.e. the lower limit for even the less-precise MSAs  
114 (54). Of these functions, 80% (52,678) contain proteins with one or more non-overlapping  
115 Pfam domains, i.e. ~1.6 domains per protein, 10,114 unique domains overall, and ~11 Fusion  
116 functions per domain. Of the smaller functions (size < 20 proteins; ~370K in total), 128,128  
117 have at least one Pfam-A domain. We hypothesize that the remaining ~240K functions, not  
118 identifiable by Pfam, may be responsible for highly specific bacterial activity.

119 We calculated homogeneity (Eqn. 1) and completeness (Eqn. 2) for how well the  
120 Fusion functions (180,806 functions of >1 sequence) of proteins with at least one Pfam  
121 domain (12,611,237) compared to Pfam-A domain assignments (Methods). An optimal  
122 homogeneity (=1) would indicate that each function only contains proteins with one domain.  
123 An optimal completeness (=1) indicates that all proteins with a specific Pfam domain only fall  
124 into a single function. Neither optimal completeness nor heterogeneity are, as described  
125 above, possible for our data. However, both homogeneity (=0.9) and completeness (=0.79)  
126 were still fairly high for our data. That is, Fusion captured much of the Pfam-like functional  
127 diversity.

128 We further compared the Fusion functions with their respective Pfam domain sets, i.e.  
129 collections of Pfam domains without accounting for domain order in sequence (57,165 sets).  
130 This comparison marginally increased completeness (=0.8, homogeneity=0.94) as compared  
131 to single domain-based evaluations (completeness=0.78, homogeneity=0.9). Additionally  
132 considering domain order (91,113 arrangements), we observed that each Fusion function most  
133 often only contained proteins of one arrangement (homogeneity =0.93) and further increased  
134 completeness over set comparisons (=0.81). Thus, while each Fusion function is highly

135 specific to a given Pfam domain arrangements (high functional specificity), each domain set  
136 or arrangement might encode multiple functions.

137 While Pfam domain arrangements are more precise than individual domains, they do  
138 not always report experimentally defined functionality(55). Fusion functions are somewhat  
139 more precise. For example, the *Geobacter sulfurreducens* acyltransferases (R)-citramalate  
140 synthase (AAR35175, EC 2.3.1.13) and *Salmonella heidelberg* 2-isopropylmalate synthase  
141 (ACF66296, EC 2.3.3.182/2.3.3.21) have the same domain arrangement (HMGL-like  
142 pyruvate carboxylase domain, PF00682, followed by a LeuA allosteric dimerization domain,  
143 PF08502) but have a different 4<sup>th</sup> digit Enzyme Commission classification (EC) number (56),  
144 indicating their different substrate specificities. Notably, these proteins fall into two different  
145 Fusion functions. To evaluate Fusion functional mappings more broadly we collected, where  
146 available, the experimentally derived EC annotations for proteins in our set (4,206 proteins,  
147 1,872 unique EC numbers) and measured the similarity of these with the corresponding 1,893  
148 Fusion functions. Fusion functions more closely resembled annotations of enzymatic activity  
149 (homogeneity = 0.95, completeness = 0.94) than those of Pfam domains. This finding  
150 suggests that our Fusion functions capture aspects of molecular function better than domain-  
151 based annotations.

152 **Organism functional profiles capture taxonomy.** For each organism of the balanced  
153 organism set, we extracted Fusion, Pfam-A domain arrangement, and GO term functional  
154 profiles. Briefly, a functional profile is the set of functions of a single organism, e.g. the set of  
155 Pfam-A domain arrangements encoded by the proteins of that organism (Methods). On  
156 average, per organism Fusion, Pfam-A and GO term profiles were of size 2,133, 1,479, 776  
157 (Fig. S2). For each organism pair, we computed profile similarity, i.e. the count of functions  
158 found in both profiles divided by the larger functional profile (Methods; Eqn. 4). On average,  
159 the (larger) Fusion-based functional profiles were less similar than the (smaller) Pfam and GO  
160 -based profiles (Fig. S3). A pair of organisms were predicted to be of the same or different  
161 taxon based on whether their similarity exceeded a set threshold ([0,1] in steps of 0.01).  
162 Predictions were compared against NCBI(33) and GTDB(57) taxonomies at six levels  
163 (phylum through genus; Methods). Note that we could not assess the species level, since no  
164 two organisms of the same species were retained in the balanced organism set.

165 Both Fusion and Pfam outperformed GO annotations in assessing taxonomic  
166 similarity. Fusion profiles were better than Pfam (Fig. S4), e.g. at 50% recall (Eqn. 5) of  
167 identifying two organisms of the same GTDB phylum, Fusion and Pfam achieved 75% and  
168 48% precision (Eqn. 5), respectively. This advantage was also present across deeper  
169 taxonomic ranks (Fig. S4). We note that Fusion's improvement over Pfam did not stem from  
170 the difference in the number of functions per organism (profile/function-ome size) as the  
171 predictive power of the function-ome size was only marginally better than random (Fig. S4).

172 These findings suggest that organism similarity established via comparison of  
173 functional profiles carries taxonomy-relevant information. Furthermore, comparing functional  
174 capabilities can reveal organism relationships that microbial taxonomy, muddled by  
175 horizontal gene transfer, is unable to resolve.

176 **Functional profiles are more informative of taxon identity than 16S rRNA.** The  
177 genetic marker most frequently used for organism taxonomic classification is the 16S rRNA  
178 gene(14) – a non-coding gene that, by definition, can not be captured by Fusion. To evaluate



179 its predictive power, we extracted 16S rRNA sequences for each genome in our complete set  
180 and calculated sequence identity for all 16S rRNA pairs (Methods).

181 Sequence similarity between 16S rRNA pairs below 97% is generally accepted as an  
182 indication that the organisms are of different species(58). Indeed, we found that 98.7%  
183 (663.7M) of the 16S rRNA pairs that originate from different species fall below the 97%  
184 sequence identity threshold, while only 2% of same species pairs do (Fig. 2, Fig. S5). That is,  
185 below this sequence identity threshold nearly all (99.96%) sequence pairs were of organisms  
186 of different species, confirming the 97% threshold as a good measure of organism taxonomic  
187 difference.

188 Using the 97% sequence identity threshold as an indicator of taxon identity, however,  
189 is impossible. Trivially, many genomes have multiple 16S rRNA genes (59). In our set, 625  
190 pairs of 16S rRNAs extracted from the same genome were less than 97% identical (minimum  
191 similarity =75.8%); in these cases, the marker gene similarity could not even identify the  
192 same genome, let alone same species. Furthermore, while almost all of same-species 16S  
193 rRNA pairs were  $\geq 97\%$  identical, nearly half of all pairs above this threshold belonged to  
194 different species (recall=98%, precision=55%, Fig. S6). In contrast, at the optimal Fusion  
195 organism functional profile similarity threshold of 75.5% (Eqn. 4; threshold established via  
196 peak F1-measure, Eqn. 6; Fig. S7), organisms were correctly identified to be of the same  
197 species with 80% precision (recall=94%, Fig. S4). At a matched level of recall, function  
198 comparisons were also more precise than 16S rRNA (75% vs. 55% precision, at 98% recall).  
199 Furthermore, Fusion achieved 95% precision for more than a third (35%) of the organism  
200 pairs, whereas 16S rRNA measures were this precise for less than a fifth (17%). The ability of  
201 16S rRNA to identify organisms of the same genus at the commonly used threshold of 95%  
202 also left much to be desired (43% precision, 78% recall). Fusion performance was  
203 significantly better (90% precision, 70% recall) when using optimal functional similarity  
204 threshold (72.3%) established for this task.

205 Functional profiles augmented 16S rRNA in determining organism species. For  
206 example, for all organism pairs sharing  $\geq 97\%$  16S rRNA identity, additionally requiring a  
207 Fusion functional similarity of 75.5% lead to an increased precision of 86% vs. 55% for 16S  
208 rRNA or 80% for Fusion similarity alone; recall was slightly decreased to 92% vs. 98% for  
209 16S rRNA and 94% for Fusion alone. These findings suggest that functional similarity is  
210 orthogonal to 16S rRNA similarity in defining taxonomic identity.

211 We note that the lack of precision in 16S rRNA has implications for metagenomic  
212 analysis, where 16S rRNA abundance is often used to assess sample taxonomic composition  
213 and functional diversity. Fusion, on the other hand, is specifically designed to enable  
214 sequence-based functional annotations and could directly inform a microbiome's functional  
215 composition.

216 **Few functions are sufficient to accurately identify taxonomy.** Earlier studies argue  
217 that a small number of carefully chosen marker genes/protein families are sufficient to  
218 determine taxonomic relationships of bacteria (57, 60). However, to be comparable across  
219 organisms, these genes should be ubiquitously present. We investigated whether a subset of  
220 Fusion functions could correctly identify two organisms of the same taxon. To this end, we  
221 progressively subset the number of Fusion functions used to generate organism functional  
222 similarities (100k, 50k, 25k, 10k, 5k, 1k, and 500 functions). We used two approaches for  
223 function selection: (1) we chose the functions based on how frequently they appeared in the

224 balanced organism set and (2) randomly sampled from the whole pool of functions.  
225 Importantly, our approach was based on the presence or absence of specific functional  
226 abilities encoded by these genes rather than their sequence similarity. We found that just  
227 1,000 common Fusion functions were sufficient to classify organism pairs into the same  
228 taxon, outperforming a “complete Pfam”-based approach (Fig. S8). The same was true for  
229 taxonomic levels of order through genus with a set of 5,000 randomly selected functions (Fig.  
230 3).

231 We further evaluated the overlap between the selected Fusion functions and the  
232 marker genes used for GTDB (bac120) classification (57, 60) (Methods). Each of the largest  
233 1,000 functions of our balanced organism set contained at least one protein associated with  
234 one of the 120 GTDB marker protein families. However, only slightly more than half (70 of  
235 the bac120) of the marker families were present in the 1,000 sets of 5,000 randomly selected  
236 Fusion functions. The remaining functions were most likely unique to individual organisms.

237 **Modularity-based taxonomic classification reflects phylogeny.** Conventional  
238 taxonomic classification schemes rely on morphological and genetic markers (NCBI) or  
239 phylogenetic analysis of genetic data (GTDB). Genetic similarity, however, is not evenly  
240 spread across different sections of the taxonomy. Assuring that taxonomic groups at a given  
241 level are equally diverse is thus a well-known consideration when developing a taxonomy.  
242 GTDB, for example, tries to address this issue by breaking up the NCBI taxonomy’s  
243 polyphyletic taxa and reassigning organisms to taxonomic ranks higher than species in order  
244 to better represent genetic diversity at the individual level(60).

245 We clustered our organism functional similarity network, where organisms are  
246 vertices and edges represent Fusion functional similarity, to extract groups of functionally  
247 related organisms – *Fusion-informed taxa* (Methods). We propose that this community  
248 detection-based taxonomy reflects functional similarity and metabolic/environmental  
249 preferences, and thus captures bacterial functional diversity better than phylogeny driven  
250 taxonomies. This is especially important when investigating environmentally specialized  
251 bacteria, e.g. symbionts or extremophiles, which are more likely to undergo convergent  
252 evolution and be functionally similar to other members of their environmental niche than to  
253 their phylogenetic relatives.

254 We identified resolution thresholds that influence the size and granularity of the  
255 Fusion-taxa such that the results best reflected existing taxonomic groupings at different  
256 taxonomic levels (Fig. 4). Note that for our balanced organism set, this excluded species and  
257 genus levels, as this set lacks pairs of organisms identical at these levels. To evaluate the  
258 similarity between Fusion-taxa and GTDB phylum/class/order/family levels we calculated the  
259 V-measure using GTDB-taxon designations for organisms as reference labels and Fusion-taxa  
260 as predicted labels. The V-Measure is the harmonic mean between homogeneity, a measure  
261 reflecting the number of organisms in a Fusion-taxon that belong to the same GTDB-taxon,  
262 and completeness, a measure reflecting the number of organisms of a GTDB-taxon are found  
263 within one Fusion-taxon. A high V-measure indicates that both homogeneity and  
264 completeness are high. For Fusion-taxa classifications, we selected the Louvain(61) clustering  
265 resolutions attaining the highest V-measures (Fig. 4, Methods). The distributions of GTDB  
266 phylum through order taxa and the corresponding-level Fusion-taxon sizes were similar, i.e.  
267 Kolmogorov-Smirnov  $p$ -values for GTDB phylum vs. Fusion resolution(0.68) = 0.89, class  
268 vs. resolution(0.68) = 0.78, and order vs. resolution(0.5) = 0.68. This observation suggests

269 some similarity between the larger organism groups captured by Fusion and GTDB despite  
270 differences in their approach to establishing organism relationships. However, the GTDB  
271 family-level taxa sizes were different from the corresponding Fusion-taxa, i.e. Kolmogorov-  
272 Smirnov  $p$ -value GTDB family vs. Fusion resolution(0.36) = 0.01, highlighting the (expected)  
273 divergence between the functional and phylogenetic approaches at finer taxonomic  
274 resolutions.

275 **Modularity-based taxonomy is robust to the addition of novel organisms.** As new  
276 organisms are added to taxonomies, organism assignments may need to be restructured. Here,  
277 updating the number of organisms per taxon or adding a new taxon containing only the novel  
278 organisms is far easier than reshuffling organisms from one taxon to others. Fusion-taxa  
279 appear robust to addition of organisms, favoring the first outcome. To demonstrate this  
280 quality, we created 50,000 new organism similarity networks by adding  $n$  organisms to the  
281 balanced organism set clusters, i.e. 100 networks for each  $n$ , where  $n$  ranges from 1 to 500  
282 organisms randomly selected from the complete organism set, but not contained in the  
283 balanced organism set; each network was of size of 1,503 to 2,002 organisms (balanced  
284 organisms set +  $n$ ). We re-clustered all networks at resolution=0.5 (Methods), the resolution  
285 we previously determined to correspond best to the GTDB order-level classifications. The  
286 resulting clusters (predicted labels) of the balanced set organisms were compared to the  
287 original clusters (reference labels).

288 We expected that addition of these new organisms, selected from the complete set, and  
289 thus similar to those already in the network, would reflect the “worst case” scenario for  
290 network stability. That is, while new organisms could be expected to form their own clusters,  
291 microbes similar to those already in the network could stimulate cluster re-definition. Our  
292 function-based clustering did not change significantly upon addition of new (existing taxon)  
293 microbes, demonstrating the stability of the identified taxa (predicted vs. reference labels;  
294 with one added organism, median V-measure=0.99; with 500 added organisms: V-  
295 measure=0.96; Methods, Fig. S9).

296 To further evaluate the (likely limited) effects of introducing organisms of novel taxa,  
297 we extracted ten genomes added to GenBank after the date of our set extraction (February  
298 2018) and whose GTDB order was not represented in our collection. We annotated the Fusion  
299 functional profiles of these organisms by running alignments, as in Zhu et al(32), against our  
300 set of proteins, computed organism similarities to the 1,502 microbes of our balanced set, and  
301 re-clustered the resulting network. Eight of these ten organisms each formed their own  
302 cluster, as expected. The two remaining organisms clustered into an already existing Fusion-  
303 taxon. Interestingly, this taxon contained an organism of the same NCBI order as the two new  
304 bacteria, illustrating the subjectivity of GTDB vs. NCBI taxonomies and highlighting the  
305 importance of organism assignment standardization.

306 When considered together, these observations suggest that functional similarity  
307 networks are stable when augmented with additional data points and present a viable  
308 alternative and/or addition to taxonomic classification of microorganisms.

309 **Co-occurrence of functions informs joint participation in molecular pathways.**  
310 Using the data from the balanced organism set, we assigned to each function a phylogenetic  
311 profile(62)(Fig. 1B). Each Fusion function was thus represented by a 1,502-length binary  
312 vector, where each entry reflected the presence or absence of the function in each organism  
313 (Methods). We then calculated the Jaccard distance (Eqn. 7) between pairs of functions.

314 Where available, we further annotated each function with the EC numbers of its member  
315 proteins; as above, most functions corresponded to only one EC. As a gold standard for our  
316 evaluations, we then retrieved 158 KEGG(63, 64) modules that encompassed at least three EC  
317 annotations resolving to Fusion functions (Methods). The median phylogenetic profile  
318 distance between pairs of Fusion functions (=0.63) co-occurring within any KEGG module  
319 was significantly lower (Wilcoxon Rank Sum, p-value  $<2.2 \times 10^{-16}$ ) than that of random  
320 (median distance=0.89) pairs (Fig. S10A). This observation supported our expectation that  
321 protein components of the same pathway have co-evolved in the same organism groups.

322 We note that the higher-than-expected distances between some functions co-occurring  
323 within a KEGG module were partially accounted for by functionally synonymous proteins  
324 (Fig S10B). That is, different proteins carrying out the same or similar molecular activity  
325 were likely part of different taxon-specific functional operons encoding the same generic  
326 molecular pathway. For example, the glycolysis module (M0001) enzymes  
327 phosphohexokinase (2.7.1.11) and pyrophosphate-fructose 6-phosphate 1-phosphotransferase  
328 (2.7.1.90) are functionally synonymous because they both of catalyze conversion of beta-D-  
329 Fructose 6-phosphate to beta-D-Fructose 1,6-bisphosphate. The phylogenetic profiles of these  
330 functions, however, were dissimilar (Jaccard distance = 0.83) as any given organism only  
331 uses one of these in its glycolytic pathway.

332 We also found that the median Jaccard distance between functions in a module  
333 reflected the combination of the number of organisms using the module, number of module  
334 enzymes, and the variance in function prevalence (Fig. 5). A lower Jaccard distance was  
335 expected of ubiquitous pathways, e.g. ribonucleotide synthesis (M00050, M00052; Figure 5A,  
336 bottom right corner) and small niche modules specific only to a few organisms, e.g.  
337 nitrification (M00528) and methanogenesis (M00567; (Figure 5A, bottom left corner). In  
338 contrast, pathways where some functions were more prevalent than others (coefficient of  
339 variation, CV, Eqn. 8) had a higher median distance. For example, the ectoine synthesis  
340 pathway (M00033) had a relatively high CV (1.2), partly due to the difference in prevalence  
341 of fructo-aldolase (EC 4.1.2.13, 407 organisms) and triose-phosphate isomerase (EC 5.3.1.1,  
342 1,492 organisms; Figure 5A, red dot, upper left corner). These relationships were not  
343 observed for a set of randomized modules (Figure 5B).

344 Note that modules with a high median function distance and high median CV could  
345 differ from common modules by only a few enzymes. For example, the nitrification module  
346 M00804 (44 enzymes) differs from complete nitrification module M00528 (33 enzymes),  
347 solely by the absence of nitrate reductase (EC 1.7.5.1). However, this difference is enough to  
348 increase the median Jaccard distance from 0.39 in M00528 to 0.99 in M00804. Biologically,  
349 this is likely the result of divergence of the nitrification pathway in a small number of  
350 organisms, i.e. nitrate reductase is only found in nitrifying bacteria – a small subset of the  
351 original population. This observation suggests a means for tracking evolution of pathways via  
352 high median functional distances.

353 **Machine learning-based sequence comparisons and sequence alignments capture**  
354 **different functional signals.** We trained a Siamese Neural Network (SNN) to predict  
355 whether two nucleic acid (gene) sequences encode proteins of the same Fusion function.  
356 SNNs are specifically optimized to assess similarities of two objects (65) – in our case  
357 gene/protein functional similarity. This is critically different from traditional classifiers,  
358 where the algorithm aims to predict which defined class an instance belongs to. In training



359 (balanced set; ~300K gene pairs, 50% same vs. 50% different function), our model attained  
360 73% overall accuracy at the default cutoff (score>0.5; area under the ROC curve, AUC\_ROC  
361 =0.80). SNN prediction scores correlated with the precision of recognizing the pair's  
362 functional identity; thus, for example, at cutoff =0.98 the method attained 96% precision for  
363 the 19% of gene pairs that reached this threshold. Note that at this stringent cutoff, for an  
364 imbalanced test set with 10% same function pairs, the network still maintained high precision  
365 (82%) at a similar recall (24%). Importantly, increasing the size of the training data to one  
366 million gene pairs, improved the method performance (AUC\_ROC = 0.81), suggesting that  
367 further improvements may be possible.

368 While somewhat correlated (Spearman rho=0.3, Fig. S11), the SNN similarity scores  
369 captured a different signal than the HFSP scores, i.e. values incorporating sequence identity  
370 and alignment length. Thus, a higher-dimensional representation of functional similarity of  
371 gene products beyond what can be detected through homology, may further improve  
372 functional annotations. To test this hypothesis, we compiled a set of Fusion functions where  
373 (1) the Fusion function was associated with only one EC number, (2) a number of different  
374 Fusion functions were associated with one EC number, and (3) different Fusion functions  
375 were associated with different EC numbers. As it was trained to do, SNN captured the  
376 similarity of genes from the first category (same Fusion function, same EC; Fig. S12 right  
377 green column, median SNN-score = 0.83) and the difference of the genes from the third  
378 category (different Fusion function, different EC; median SNN-score = 0.13; Fig. S12, left  
379 orange column). However, genes of the second category (different Fusion functions, same EC  
380 number) were scored significantly higher (median SNN-score = 0.7; Fig. 7, left green  
381 column) by the SNN than expected. We note that these different Fusion function gene pairs  
382 predicted to be of the same function would be considered false positives in SNN training.  
383 Thus, our SNN identified same enzymatic activity gene pairs that were NOT captured as same  
384 function by the homology-based Fusion.

385 **Machine learning-based sequence comparisons and structure alignments capture**  
386 **orthogonal signals.** What functional similarity does an SNN capture? We expected that  
387 functionally similar proteins that are not sequence similar should share structural  
388 similarity(66, 67). We compiled a set of Fusion proteins that have a structure in the PDB and  
389 then computed structural (TM-scores) and functional (SNN-scores) similarities for all pairs  
390 (Methods). Note that we did not use predicted protein structures(68, 69) to avoid  
391 compounding machine learning preferences.

392 First, we examined the relationship between the TM-score and SNN-score for  
393 sequence-similar protein pairs (HFSP score  $\geq 0$ ; Fig. S13). We found that 97% of these pairs  
394 (3,931 of 4,072) were structurally similar (TM-score  $\geq 0.7$ ; Table S1) and 94% (3,817) were  
395 predicted by the SNN to be of the same function (SNN-score  $\geq 0.5$ ; Table S2). These  
396 observations highlight HFSP's precision and confirm the expectation that high sequence  
397 similarity in most cases encodes for structural and functional identity.

398 It is worth noting that only a fifth (3,931 of 17,702) of all protein pairs with a TM-  
399 score  $\geq 0.7$  also had an HFSP  $\geq 0$ . SNN predictions, on the other hand, identified 77% (13,618  
400 of 17,702) of the high TM-scoring pairs to be of the same function. Note that a quarter (3,544  
401 of 13,618) of the SNN predictions had high reliability (SNN-score  $\geq 0.98$ ; Figure 6, Table S3)  
402 and many of these (2,028; 57%) were also sequence similar (HFSP  $\geq 0$ ). These observations

403 suggest that function transfer by homology, while precise for the pairs it does identify, fails to  
404 find the more remote functional similarity of most protein pairs.

405 Most (73%, 21,412 of 29,213) of the reliably structurally dissimilar protein pairs (TM-  
406 scores  $<0.2$  and excluding pairs that were filtered out by Foldseek(70), Methods) were  
407 predicted to be functionally different by SNN (score  $<0.5$ ) and only 80 pairs ( $<1\%$ ) attained a  
408 high SNN score ( $\geq 0.98$ ). Of pairs in the  $[0.2,0.5)$  and  $[0.5,0.7)$  TM-scores ranges, i.e. those  
409 that share minimal structural similarity, SNN labeled 45% and 53%, respectively, as having  
410 the same Fusion function; for both sets, only 4% reached SNN-score  $\geq 0.98$ , which stands in  
411 contrast to the  $\sim 26\%$  of the protein pairs with TM-score  $\geq 0.7$ . These observations suggest that  
412 SNN, though not trained on protein structure, reliably identifies presence/absence of  
413 functional similarity at the extremes of structural similarity; it is significantly less certain for  
414 proteins that are only mildly structurally similar.

415 We further evaluated if protein pairs with known EC annotations (Methods) followed  
416 a similar structure-function relationship. As before (Fig. S12), we observed that the proteins  
417 of the same EC number were, on average, predicted with a higher SNN-score than different-  
418 EC pairs (Fig. S14). We then measured the ability of the SNN and the TM-score to predict the  
419 3<sup>rd</sup> EC level of each protein pair. We found that while the SNN precision and recall were  
420 significantly above random, they were lower than simply using the TM-score (Figure 6).  
421 Importantly, we note that combining the TM and SNN predictions significantly improved  
422 recognition of genes of the same function. Adding an SNN-score evaluation of structurally  
423 similar protein pairs (TM-score  $\geq 0.7$ ) increased the precision to 90% at recall 30%. We thus  
424 suggest that the SNN reports a signal of functional similarity that is captured neither by  
425 sequence nor structure similarity alone.

426 To explore this signal further, we investigated outlier protein pairs in our set, i.e.  
427 structurally different (TM-score  $<0.2$ ), sequence dissimilar (HFSP $<0$ ) pairs of proteins of the  
428 same 4<sup>th</sup> digit EC number attaining an SNNscore $\geq 0.98$ , i.e. UniProt ids: P37870/P37871,  
429 O35011/O31718, and Q8RQE9 /P3787. For these, both TMAAlign and the SNN were correct.  
430 That is, for each pair, the sequences were structurally different chains of the same heteromer  
431 structure (P37870/P37871 and O35011/O31718) or chains of different structures of the same  
432 protein complex (Q8RQE9/P37871) – all annotated with one EC number. While these three  
433 examples are anecdotal evidence they also clearly demonstrate the limitations of available  
434 chain-based functional annotations.

435 Going forward, our SNN can be further optimized and used for function prediction.  
436 We suspect that we will be able to create a functional ontology, combining Fusion functions  
437 that share a higher level of functional similarity not captured via sequence, or even structure,  
438 comparisons. We also see an exciting prospect for future use of our DNA-based predictor in  
439 metagenomics, where gene to fragment comparisons could potentially allow for forgoing  
440 assembly, to generate functional abundance profiles of microbial communities.

441 **Summarizing the Findings.** Understanding bacterial lifestyles requires describing  
442 their functional capabilities and critically contributes to research in medical, environmental,  
443 and industrial fields. The recent explosion in completely sequenced bacterial genomes has,  
444 simultaneously, created a deluge of functionally un-annotated and misannotated sequences  
445 and allowed for the development of new and informative sequence-based methods. Here, we  
446 optimized Fusion, a method for annotating the functional repertoires of bacteria, to  
447 recapitulate bacterial taxonomic assignments and create a novel functional taxonomy.

448 Importantly, we showed that bacterial functional profiles are significantly better at  
449 differentiating distinct species than 16S rRNA comparisons. We also found that using  
450 phylogenetic profiles of individual bacterial functions could provide insight into emergent  
451 functionality and potentially aid in the detection of novel metabolic pathways. Finally, we  
452 trained a Siamese Neural Network (SNN) to label pairs of genes whose product proteins are  
453 functionally similar. Notably, our SNN's ability to capture functional similarity signals that  
454 are orthogonal to sequence and structural signals may open the door to investigating remote  
455 homology. We propose that this method could elucidate a non-sequence or structure-driven  
456 functional ontology. Furthermore, it could potentially be optimized for extraction of  
457 functional annotation directly from metagenomic reads.

458

## 459 **Materials and Methods**

460 **Microbial proteomes.** We retrieved a set of microbial proteomes from GenBank (44,  
461 45) (NCBI public ftp - <ftp.ncbi.nlm.nih.gov/genomes/genbank/bacteria>; February 28, 2018)  
462 and extracted the corresponding coding sequences from the complete bacterial genome  
463 assemblies. As per NCBI, complete assemblies are complete gapless genomic assemblies for  
464 all chromosomes, i.e. in bacteria, the circular genome and any plasmids that are present. Our  
465 resulting dataset thus contained the proteomes of 8,906 distinct bacterial genome assemblies  
466 with a total of 31,566,498 proteins (*full protein set*). We further redundancy reduced this set  
467 at 100% sequence identity over the complete length of the two proteins using CD-Hit (71,  
468 72). Our *sequence-unique protein set* contained 15,629,432 sequences. Sequences shorter  
469 than 23 amino acids (1,345 sequences) were removed from the set as this length is insufficient  
470 to determine functional similarity between proteins (46). All further processing was done on  
471 the resulting set of 15,628,087 sequences. Of these, 12.78M were truly unique, i.e. proteins  
472 for which no 100%-identical sequence exists in the original full protein set; the remaining  
473 2.85M sequences represented the nearly 16M proteins that were redundant across organisms  
474 in our set.

475 **Computing protein functional similarities.** Functional similarities between our  
476 sequence-unique proteins were assessed using HFSP(46). Specifically, we generated a set of  
477 all-to-all alignments with MMSeqs2(73) (evalue  $\leq 1e-3$ , inclusion evalue  $\leq 1e-10$ , iterations =  
478 3). Note that due to the specifics of MMSeqs2, the two alignments for a every pair of proteins  
479  $P_i$  and  $P_j$ , i.e.  $P_i$ -to- $P_j$  and  $P_j$ -to- $P_i$ , are not guaranteed to be identical and thus may have  
480 different HFSP scores. We chose to conservatively represent each protein pair by only one,  
481 minimum, HFSP value. For every protein pair, we retained in our set only the alignments  
482 where this HFSP value was  $\geq 0$ ; at this threshold HFSP correctly predicts functional identity of  
483 proteins with 45% precision and 76% recall (46). Any protein without predicted functional  
484 similarity to any other protein in the sequence-unique protein set was designated as having a  
485 unique function, i.e. true singletons (766,050 proteins). Of these, 57,646 sequences  
486 represented 127,543 proteins in the full protein set, while 708,404 were truly unique. The  
487 remaining 14,862,037 proteins were connected by  $\sim 22.2$  billion functional similarities.

488 **Generating Fusion functions.** We built a functional similarity network using the  
489 22.2B similarities (edges) of the 14.86M proteins (vertices) as follows: For any protein pair  
490  $P_i P_j$ , an edge was included if (1)  $HFSP(P_i P_j)$  was  $\geq 30$  or if (2)  $HFSP(P_i P_j) \geq$   
491  $0.7 * \max(HFSP(P_i P_k), HFSP(P_j P_l))$ , where proteins  $P_k$  and  $P_l$  are any other proteins in our set;  
492 note that  $P_k$  and  $P_l$  can but don't have to be the same protein. The first cutoff at  $HFSP \geq 30$ ,

493 ensured that our protein pairs were often correctly assigned same function (precision = 95%).  
494 Our second criterion aimed to assuage the much lower recall (10%) and capture more distant  
495 relationships while introducing as little noise as possible, i.e. only reporting functionally  
496 similar pairs at specifically-targeted, stricter HFSP cutoffs. The resulting network contained  
497 14,130,628 vertices connected by 780,255,934 edges; 731,409 proteins were disconnected  
498 from the network, i.e. *putative* functionally unique singletons. The network was composed of  
499 multiple connected components, where the largest contained 481,801 proteins (distribution of  
500 component sizes in Fig. S1).

501 We used HipMCL(74) (High-performance Markov Clustering), an optimized version  
502 of Markov Clustering(75, 76), to further individually cluster the components of this network  
503 into functional groups. Note that as HipMCL requires a directed graph as input, we converted  
504 each edge in our data into a pair of directed edges of the same weight. The key parameters  
505 chosen for each HipMCL run were S=4000, R=5000, and inflation (I) =1.1. This clustering  
506 resulted in 1,432,643 protein clusters as well as 1,235 clusters containing only one protein,  
507 i.e. additional *putative singletons* for a total of 732,644.

508 Each of the 1,432,643 MCL clusters was further clustered using CD-Hit at 40%  
509 sequence identity (with default parameters). Note that only 7% of the MCL clusters contained  
510 more than one CD-HIT cluster. A total of 1,632,986 CD-Hit cluster representatives, i.e.  
511 longest protein in each CD-HIT cluster, were thus extracted. To this set of representatives, we  
512 added the putative singletons for a total of 2,365,630 proteins. These were used to generate a  
513 new functional similarity network by including all edges with  $HFSP(P_i P_j) \geq 0$ . Note that  
514 226,346 (~10%) of these were not similar to any other representative proteins; of these, ~40k  
515 were originally designated putative singletons. The resulting functional similarity network  
516 comprised 2,139,284 vertices and ~303M edges. The network was re-clustered with HipMCL  
517 (S=1500, R=2000, I=1.4; smaller inflation values did not generate results due to MPI  
518 segmentation faults that could not be resolved) generating 438,130 Fusion functions.

519 **Enzymatic function annotation.** Information about protein enzymatic activity  
520 (Enzyme Commission, EC number(56)) was extracted from Swiss-Prot(77, 78) (June 2021) as  
521 follows: for each protein there had to be (1) experimental evidence for protein existence at  
522 protein level, (2) experiment-based functional annotation, and (3) only one EC number, fully  
523 resolved to all 4 levels. The resulting dataset was redundancy reduced at 100% sequence  
524 identity across the entire protein length. Swiss-Prot entries sharing the same sequence, but  
525 assigned different EC annotations, were excluded from consideration. The final data set  
526 contained 18,656 unique proteins and 4,269 unique EC annotations. The overlap between the  
527 EC data and the Fusion protein set (*Fusion enzyme set*) comprised 4,206 unique proteins in  
528 1,872 unique EC annotations.

529 **Pfam data.** Protein mappings to Pfam(47) domains (Pfam-A version 34) were  
530 generated using pfamscan v1.4(79) with default values; in hmmscan(80) (hmmer v3.3), HMM  
531 evalue (-E = 10) and domain evalue (--domE = 10) were used. If the sequence hit multiple  
532 Pfam domains belonging to the same clan/family, only the clan was reported. For 12,720,756  
533 sequence-unique proteins (85% of our 14.86M) the set of non-overlapping Pfam domains and  
534 their order in sequence were extracted, e.g. given domains X and Y, the domain arrangements  
535 'XYY', 'XY' and 'YX' are regarded as three individual occurrences; the remaining 15% of  
536 the proteins did not match any Pfam-A domain. We thus identified 92,321 unique Pfam



537 domain arrangements. These corresponded to 58,021 domain sets, where the domain  
538 arrangements ‘XYY’, ‘XY’ and ‘YX’ resolve to only one domain set representation (X,Y).

539 **Overlap between Fusion clusters and GTDB.** In order to compare Fusion functions  
540 to the set of 120 marker proteins/protein families that GTDB uses (TIGRFAM & Pfam  
541 families) to establish taxonomic relationships between organisms (bac120), Fusion proteins  
542 were associated with TIGRFAM (release 15.0 – September 2014) & Pfam (PFAM-A version  
543 34) domains using hmmscan (hmmer v3.3). Only one best TIGRFAM/Pfam hit (i.e. smallest  
544 e-value) was extracted per protein. Results were limited to hits with HMM evalue (-E = 1)  
545 and domain evalue (--domE = 10). Fusion functions were assigned the set of  
546 TIGRFAMs/Pfams according to their proteins matches. Finally, the overlap between domain  
547 associations of Fusion functions and the TIGRFAMs/Pfams used by GTDB as marker genes  
548 was evaluated.

549 **GeneOntology annotations.** GO(48, 49) “molecular function” annotations were  
550 extracted from the GO 2021-09-01 release. For each protein, its set of GO annotations  
551 included all protein self-annotations, as well as annotations of its parent nodes, i.e. other  
552 nodes connected via an “is a” edge up to the root of the molecular function subgraph. This  
553 resulted in 25,825 sets of GO terms for 7,313,428 (49% of 14.9M) sequences-unique proteins.

554 **Comparing Fusion functions to existing functional annotations.** We compared  
555 Fusion functions to EC and Pfam annotations by calculating the homogeneity (h, Eqn. 1),  
556 completeness (c, Eqn. 2) and V-Measure (v, Eqn. 3) ( $\delta I$ ) values using scikit/python ( $\delta 2$ ).  
557 When comparing Fusion functions to, for example, EC numbers, homogeneity describes how  
558 often a Fusion function is associated with multiple EC numbers. That is, a high homogeneity  
559 (close to 1) signifies a clustering where most Fusion functions have an association to only one  
560 EC number. Completeness describes how often a specific EC number can be found in  
561 different Fusion functions. A high completeness (close to 1) indicates that for most ECs, a  
562 specific EC number is associated with only one or a small number of functions. V-Measure  
563 represents the harmonic mean between homogeneity and completeness. A V-measure of 1 is  
564 indicative of an optimal clustering, where each function is only associated with one EC  
565 number, and an EC number is only associated with this one function.

566

567 (Eqn. 1) 
$$h = \begin{cases} 1 & \text{if } H(C, K) = 0 \\ 1 - \frac{H(C|K)}{H(C)} & \text{else} \end{cases} \quad \text{where}$$

568 
$$H(C|K) = - \sum_{k=1}^{|K|} \sum_{c=1}^{|C|} \frac{a_{ck}}{N} \log \frac{a_{ck}}{\sum_{c=1}^{|C|} a_{ck}}$$

569 
$$H(C) = - \sum_{c=1}^{|C|} \frac{\sum_{k=1}^{|K|} a_{ck}}{n} \log \frac{\sum_{k=1}^{|K|} a_{ck}}{n}$$

570

571

572 (Eqn. 2) 
$$c = \begin{cases} 1 & \text{if } H(K, C) = 0 \\ 1 - \frac{H(K|C)}{H(K)} & \text{else} \end{cases} \quad \text{where}$$

573 
$$H(K|C) = - \sum_{c=1}^{|C|} \sum_{k=1}^{|K|} \frac{a_{ck}}{N} \log \frac{a_{ck}}{\sum_{k=1}^{|K|} a_{ck}}$$

574 
$$H(K) = - \sum_{k=1}^{|K|} \frac{\sum_{c=1}^{|C|} a_{ck}}{n} \log \frac{\sum_{c=1}^{|C|} a_{ck}}{n}$$

575 (Eqn. 3) 
$$v = \frac{2 \cdot h \cdot c}{h + c}$$

576  
577 **Taxonomy information.** Our taxonomic analyses were conducted on the basis of two  
578 taxonomy schemes: the NCBI taxonomy(33) and the GTDB(57) (genome taxonomy  
579 database). NCBI taxonomy rank information for each assembly was retrieved during protein  
580 dataset extraction (Feb 2018) and is available for all 8,906 organisms in our set. GTDB  
581 taxonomy information was extracted from GTDB release rs202 (April 2021). Genbank  
582 assembly ids were mapped to bacterial assemblies available in GTDB. GTDB taxonomy  
583 information is available for 99% (8,817) of the organisms.

584 **Balancing the assembly set.** According to GTDB, the 8,906 assemblies/organisms in  
585 our set belong to 3,005 species. Of these species, 2,252 (75%) have only one associated  
586 organism, whereas others have hundreds; e.g. *E. coli* and *B. pertussis* have 472 and 360  
587 assemblies, respectively. We generated a balanced organism set to reduce this unevenness.  
588 First, we reduced our full set of 8,906 assemblies to retain the 3,012 genomes that were  
589 representative of strains included in the GTDB bac120 phylogenetic tree. Note that of these,  
590 2,206 genomes were in both GTDB and our data, while 806 genomes were not present in our  
591 set and were represented by other assemblies of these same strains. Using dendropy(83), we  
592 then extracted from the full GTDB bac120 tree (47,895 organisms) a subtree containing only  
593 these 3,012 representatives while retaining the original branch lengths. We used  
594 Treemmer(84) to determine which leaves to retain in our set such that the RTL (relative tree  
595 length) of the pruned tree was  $\geq 0.90$ . RTL is used as an indicator of retained genetic diversity  
596 after pruning, reflected as the sum of all branch lengths in the pruned tree in relation to the  
597 full tree. We thus selected 1,502 assemblies (further referenced to as the *balanced organism*  
598 *set*) – a minimum set of organisms that retains at least 90% genetic diversity present in our  
599 complete set of 8,906 assemblies.

600 **Computing organism functional similarity.** Each organism in our set can be  
601 represented by a functional profile, i.e. a set of corresponding Fusion functions, Pfam  
602 domains, or GO annotations. Functional similarity between the function-omes of two  
603 organisms,  $F_i$  and  $F_j$ , was calculated, as previously described (27, 32), by dividing the number  
604 of their shared functions by the size of the larger of the two profiles (Eqn. 4).

605 (Eqn. 4) 
$$FuncSim(F_i, F_j) = \frac{|F_i \cap F_j|}{\max(|F_i|, |F_j|)}$$

606 Fusion functional profiles for similarity calculations were generated at Fusion Level 1  
607 with and, separately, without the inclusion of singletons. Pfam functional profiles were  
608 generated using Pfam domain arrangements and, separately, domain sets, as described above.  
609 GO functional profiles were generated using the GO terms extracted per proteins as described  
610 above. Note that Pfam and GO annotations are not available for all proteins, but each protein  
611 has an associated Fusion function. Thus, each method-based functional profiles (i.e. GO vs  
612 Pfam vs Fusion) of a single organism could be based on different sets of proteins.

613 We computed the precision/recall (Eqn. 5) values for correctly identifying two  
614 organisms as being of the same taxonomic rank based on their shared functional similarity.  
615 This was done at each taxonomic rank (phylum, class, order, family, genus, species) for both  
616 taxonomic definitions (NCBI and GTDB) and using a series of similarity thresholds ranging  
617 from 0 to 1 in increments of 0.01.

618 (Eqn. 5) 
$$Precision = \frac{TP}{TP+FP}; Recall = \frac{TP}{TP+FN}$$

619 Here any pair of two organisms of the same taxonomic classification above the chosen  
620 threshold are true positives (TP), whereas pairs below the threshold are false negatives (FN).  
621 Any pair of two organisms of different taxonomic classifications above the similarity  
622 threshold are false positives (FP), while pairs below are true negatives (TN).

623 **Grouping organisms by functional similarity.** An organism similarity network was  
624 generated using Fusion functional profiles. Here assemblies (vertices) were connected by  
625 Fusion functional similarity edges; the resulting network is complete (all-to-all edges are  
626 present) as any two organisms share some similarity. We used Louvain clustering (61) to  
627 identify organism groups; implemented in ‘python-louvain’  
628 (<https://github.com/taynaud/python-louvain>), an extension to ‘networkx’  
629 (<https://networkx.org>). Organism groups at varying levels of granularity were generated by  
630 varying the resolution threshold parameter of Louvain clustering (resolution 0 to 1.5 in  
631 increments of 0.01), where larger resolution values lead to fewer but larger clusters. The V-  
632 measures (Eqn. 3) of the resulting partitions (“predicted labels”) vs. GTDB taxa (reference  
633 labels) were calculated.

634 **16S rRNA extraction and similarity calculations.** 16S rRNA sequences were  
635 extracted from the NCBI GenBank database for 8,479 of the 8,906 organisms (427 organisms  
636 were missing annotated 16S rRNAs). From RDP (Ribosomal Database Project, v11.5)(85),  
637 we further extracted all 16S rRNA sequences and their corresponding multiple sequence  
638 alignment (MSA). The 16S rRNAs of the 8,479 organisms that were not contained in the RDP  
639 MSA were added using Infernal 1.1.4 (86) and the RDP bacterial covariance model. Using the  
640 resulting MSA we extracted gapless pairwise sequence identities for all 16S rRNA pairs (i.e.  
641 683,261,061 pairs between 36,967 16S rRNA sequences).

642 We calculated the optimal F-measure (Eqn. 6) for both identifying organisms of the  
643 same species/genus using measures of 16S rRNA identity and Fusion organism similarity  
644 (Eqn. 4). Here, true positives (TP) are organisms of same taxon, attaining an identity or  
645 similarity measure at or above the chosen threshold, false negatives (FN) are organisms of  
646 same taxon but scoring below the threshold, and false positives (FP) are organisms of  
647 different taxa and scoring at or above the threshold.

648 (Eqn. 6) 
$$F1 - measure = \frac{2 \times TP}{2 \times TP + FP + FN}$$

649

650 **Fusion function phylogenetic profiles.** For all functions found in at least five  
651 organisms of the balanced organism set (1,502 organisms total), we created a profile  
652 indicating all assemblies containing a protein assigned to the function, akin to the Pelligrini et  
653 al study(62). Each functional profile was thus a 1,502-length binary vector; i.e. the presence  
654 or absence of the Fusion function in each organism was indicated with a 1 or 0. Furthermore,  
655 to be considered, each function had to have >5% of its proteins either belong to or have an  
656 HFSP score >20 with a protein in the Fusion enzyme set. Jaccard distance  $D_j$  was calculated  
657 for every pair of profiles  $F_1$  and  $F_2$  (Eqn. 7).

$$658 \quad (\text{Eqn. 7}) \quad D_j(F_1, F_2) = 1 - \frac{|F_1 \cap F_2|}{|F_1 \cup F_2|}$$

659 Note that any pair of functions which had the same 4<sup>th</sup> level EC digit and a profile  
660 Jaccard distance >0.80, i.e. same enzyme found in very different organisms, was likely to  
661 represent only homologs of only slightly different functions; as such, profiles of these  
662 functions were merged. Jaccard distances were then recalculated for all resulting pairs of  
663 functions. This process was repeated until no two functions which match these conditions  
664 remained. The final profile matrix consisted of 1,420 functions, each represented by a 1,502-  
665 length profile vector.

666 For pairs of functions which co-occurred in a KEGG module, we calculated the  
667 coefficient of variation (CV) to assess the dispersion of the Jaccard Distances (Eqn. 7) in a  
668 module (Eqn. 8). A higher CV indicates that the functions present are found in different sets  
669 of organisms, while a low CV indicates that all functions in a module are found in nearly the  
670 same organisms.

$$671 \quad (\text{Eqn. 8}) \quad CV = \frac{\sigma}{\mu}$$

672 **KEGG module annotations for Fusion functions.** From KEGG (Kyoto  
673 Encyclopedia of Genes and Genomes)(63, 64), using R and the web scraping packing "rvest",  
674 we extracted the 280 unique KEGG modules and their corresponding enzymes (4<sup>th</sup> level EC  
675 numbers) found in our balanced organism set. We filtered these modules to retain those with  
676 at least three EC annotations mappable to Fusion functions. The resulting 158 modules were  
677 used for further analysis. Any pair of functions participating in the same module were labeled  
678 as co-occurring. To create a random set, we selected function pairs that were not present in  
679 the same module. We evaluated the median profile distances between co-occurring and  
680 random function pairs (Z-test at  $\alpha = 0.05$ , performed by bootstrapping subsamples of both sets  
681 of function pairs a thousand times). Note that a Fusion function may be mapped to more than  
682 one EC number and the same EC number may be assigned to more than one function. If a  
683 function was annotated with multiple EC numbers shared in a single module, the distance  
684 between the function and other shared functions was only considered once. A null set of  
685 profile distances was created by randomly permuting the EC numbers assigned to each  
686 module.

687 **Machine learning-based predictor of shared protein functionality.** We trained a  
688 Siamese Neural Network (SNN) (39) predictor to assess whether any two DNA sequences  
689 encoded proteins of the same Fusion function. SNNs are a class of neural network  
690 architectures that contain two identical subnetworks, i.e. the networks have the same  
691 configuration with the same parameters and weights. This type of network is often used to  
692 find the similarity of the inputs – in our case, two sequences encoding proteins of the same  
693 function. Because SNNs identify similarity levels, rather than predicting specific classes of



694 each input, they require significantly less data for training and are less sensitive to class  
695 imbalance. The latter was particularly a benefit here because the number of sequence pairs of  
696 different functions necessarily drastically exceeds the number of pairs of the same function.  
697 Additionally, as SNNs output a similarity metric rather than a probability score, they are  
698 likely specifically informative of the various levels of functional similarity, e.g. for a given  
699 pair of enzymes, whether two genes act upon the same bond vs. whether they use the same  
700 electron donor.

701 To train the model, we extracted 70 random Fusion functions, each containing at least  
702 ten different proteins from our sequence-unique set. The set of functions was split 50/10/10  
703 for training, testing and validation. For training and validation, we balanced the dataset, i.e.  
704 we randomly selected gene sequence pairs such that 50% of the pairs included genes of same  
705 Fusion function and 50% were of different function. The final training set contained 20M  
706 gene sequence pairs generated from 29,907 sequences, the validation set contained 200,000  
707 pairs and 9,982 sequences respectively. In testing we used balanced as well as imbalanced  
708 data sets. The imbalanced test set was generated to better resemble real-world data with a split  
709 of 90%/10% where 90% of the sequence pairs are between sequences of different function.  
710 The test set contained 100,000 sequence pairs generated from 1,000 gene sequences.

711 We tokenized protein-encoding genes to codons, i.e. split into non-overlapping 3-  
712 nucleotide chunks of sequence and projected each token into the LookingGlass(87)  
713 embedding space (length=104). The embeddings were then processed via an LSTM (88) and  
714 further used in SNN training. Note that at most the first 1,500 tokens were embedded per  
715 sequence. For sequences shorter 1,500 codons, the embedding vector was zero padded, i.e.  
716 any position in the vector after the last token was set to 0. The model was trained and  
717 validated in 50 iterations on our balanced training/validation data set. After 50 iterations  
718 performance of the model reached a precision of 0.72 and recall of 0.72 on the validation set  
719 at the default threshold of 0.5. The final model was tested on the imbalanced (90/10 split  
720 different/same function sequence pairs) attaining a precision of 0.22 and recall of 0.80 at the  
721 default prediction score cut-off of 0.5.

722 To further evaluate the model, we extracted a set of Fusion functions associated with  
723 only one level 4 EC annotation, but where the EC annotation was associated with multiple  
724 Fusion functions. We then predicted SNN scores for three sets of protein pairs: (1) proteins  
725 from the same Fusion function and same EC annotation, (2) proteins from different Fusion  
726 functions and same EC annotation, and (3) proteins of different Fusion functions and different  
727 EC annotation.

728 **Structural alignments of Fusion proteins.** We extracted from the PDB(89, 90) (May  
729 2022) the available structure information for proteins in our set, i.e. 79,464 chains/entities  
730 mapping to 5,153 protein sequences in our sequence-unique protein set. Where multiple PDB  
731 structures mapped to one protein sequence we selected the PDB entry with the best resolution  
732 (lowest Å). For this set, we used foldseek(70) (-alignment-type 1, --tmscore-threshold 0.0) to  
733 identify structure pair TMscores(91) from TM-align(92). When a protein sequence pair  
734 resolved to multiple PDB entity (chain) pairs we selected the entity pair with the highest  
735 TMscore. Note that Foldseek was unable to generate TMscores for 498 PDB structures  
736 (mapping to 1,005 protein sequences) due to computational limitations and we excluded any  
737 structural/protein pair that included one of these from further consideration.

738 For the resulting 8,527,385 protein pairs we generated SNN prediction scores. For  
739 8,080,324 of 8,527,385 (95%) pairs no TM-scores could be generated as they did not pass the  
740 pre-filtering step of Foldseek, i.e. they had no similar folds at all; for these we assumed a  
741 TMscore = 0. Notably, 143,347 (1.7%) of these were still predicted by the SNN to have high  
742 functional similarity (SNNscore $\geq$ 0.98); we assume this percentage to be the approximate error  
743 rate of the SNN.

744 We also created subsets of PDB entity pairs where each protein was annotated with an  
745 E.C. number, i.e. proteins extracted for the Fusion enzyme set.

746

747

748

## 749 References

- 750 1. M. J. Blaser *et al.*, Toward a Predictive Understanding of Earth's Microbiomes to  
751 Address 21st Century Challenges. *mBio* **7**, e00714-00716 (2016).
- 752 2. P. G. Falkowski, T. Fenchel, E. F. Delong, The Microbial Engines That Drive Earth's  
753 Biogeochemical Cycles. *Science* **320**, 1034-1039 (2008).
- 754 3. A. Jousset *et al.*, Where less may be more: how the rare biosphere pulls ecosystems strings. *The*  
755 *ISME Journal* **11**, 853-862 (2017).
- 756 4. J. A. Russell, N. Dubilier, J. A. Rudgers, Nature's microbiome: introduction. *Molecular Ecology*  
757 **23**, 1225-1237 (2014).
- 758 5. Y. Bromberg *et al.*, Quantifying structural relationships of metal-binding sites suggests origins  
759 of biological electron transfer. *Science Advances* **8**, eabj3984 (2022).
- 760 6. A. Shade, Understanding Microbiome Stability in a Changing World. *mSystems* **3**, (2018).
- 761 7. F. Beghini *et al.*, Integrating taxonomic, functional, and strain-level profiling of diverse  
762 microbial communities with bioBakery 3. *eLife* **10**, e65088 (2021).
- 763 8. E. A. Franzosa *et al.*, Species-level functional profiling of metagenomes and  
764 metatranscriptomes. *Nature Methods* **15**, 962-968 (2018).
- 765 9. J. Kaminski *et al.*, High-Specificity Targeted Functional Profiling in Microbial Communities  
766 with ShortBRED. *PLOS Computational Biology* **11**, e1004557 (2015).
- 767 10. E. Bolyen *et al.*, Reproducible, interactive, scalable and extensible microbiome data science  
768 using QIIME 2. *Nature Biotechnology* **37**, 852-857 (2019).
- 769 11. E. Stackebrandt, B. M. Goebel, Taxonomic note: a place for DNA-DNA reassociation and 16S  
770 rRNA sequence analysis in the present species definition in bacteriology. *International journal*  
771 *of systematic and evolutionary microbiology* **44**, 846-849 (1994).
- 772 12. D. J. Brenner, G. R. Fanning, K. E. Johnson, R. V. Citarella, S. Falkow, Polynucleotide  
773 sequence relationships among members of Enterobacteriaceae. *J Bacteriol* **98**, 637-650 (1969).
- 774 13. D. R. Boone, R. W. Castenholz, G. M. Garrity, J. Stanley, *Bergey's Manual® of Systematic*  
775 *Bacteriology: Volume One The Archaea and the Deeply Branching and Phototrophic Bacteria*.  
776 (Springer, 2001).
- 777 14. C. R. Woese, O. Kandler, M. L. Wheelis, Towards a natural system of organisms: proposal for  
778 the domains Archaea, Bacteria, and Eucarya. *Proceedings of the National Academy of Sciences*  
779 **87**, 4576-4579 (1990).

- 780 15. J. S. Johnson *et al.*, Evaluation of 16S rRNA gene sequencing for species and strain-level  
781 microbiome analysis. *Nature Communications* **10**, 5029 (2019).
- 782 16. K. T. Konstantinidis, A. Ramette, J. M. Tiedje, Toward a More Robust Assessment of  
783 Intraspecies Diversity, Using Fewer Genetic Markers. *Applied and Environmental*  
784 *Microbiology* **72**, 7286-7293 (2006).
- 785 17. K. T. Konstantinidis, J. M. Tiedje, Prokaryotic taxonomy and phylogeny in the genomic era:  
786 advancements and challenges ahead. *Current Opinion in Microbiology* **10**, 504-509 (2007).
- 787 18. D. Gevers *et al.*, Re-evaluating prokaryotic species. *Nature Reviews Microbiology* **3**, 733-739  
788 (2005).
- 789 19. R. Rosselló-Mora, Updating Prokaryotic Taxonomy. *Journal of Bacteriology* **187**, 6255-6257  
790 (2005).
- 791 20. D. Gevers *et al.*, Stepping stones towards a new prokaryotic taxonomy. *Philosophical*  
792 *Transactions of the Royal Society B: Biological Sciences* **361**, 1911-1916 (2006).
- 793 21. E. Hilario, J. P. Gogarten, Horizontal transfer of ATPase genes — the tree of life becomes a net  
794 of life. *Biosystems* **31**, 111-119 (1993).
- 795 22. A. Babić, A. B. Lindner, M. Vulić, E. J. Stewart, M. Radman, Direct Visualization of Horizontal  
796 Gene Transfer. *Science* **319**, 1533-1536 (2008).
- 797 23. N. Goldenfeld, C. Woese, Biology's next revolution. *Nature* **445**, 369-369 (2007).
- 798 24. M. N. Price, P. S. Dehal, A. P. Arkin, Horizontal gene transfer and the evolution of  
799 transcriptional regulation in *Escherichia coli*. *Genome Biology* **9**, R4 (2008).
- 800 25. Z. He, S. Xu, S. Shi, Adaptive convergence at the genomic level—prevalent, uncommon or very  
801 rare? *National Science Review* **7**, 947-951 (2020).
- 802 26. M. R. Farhat *et al.*, Genomic analysis identifies targets of convergent positive selection in drug-  
803 resistant *Mycobacterium tuberculosis*. *Nature Genetics* **45**, 1183-1189 (2013).
- 804 27. C. Zhu, T. O. Delmont, T. M. Vogel, Y. Bromberg, Functional basis of microorganism  
805 classification. *PLoS Comput Biol* **11**, e1004472 (2015).
- 806 28. G. Rastogi, R. K. Sani, in *Microbes and Microbial Technology: Agricultural and Environmental*  
807 *Applications*, I. Ahmad, F. Ahmad, J. Pichtel, Eds. (Springer New York, New York, NY, 2011),  
808 pp. 29-57.
- 809 29. M. G. I. Langille *et al.*, Predictive functional profiling of microbial communities using 16S  
810 rRNA marker gene sequences. *Nature Biotechnology* **31**, 814-821 (2013).
- 811 30. K. H. Schleifer, Classification of Bacteria and Archaea: Past, present and future. *Systematic and*  
812 *Applied Microbiology* **32**, 533-542 (2009).
- 813 31. J. M. Young, Implications of alternative classifications and horizontal gene transfer for bacterial  
814 taxonomy. *International Journal of Systematic and Evolutionary Microbiology* **51**, 945-953  
815 (2001).
- 816 32. C. Zhu, Y. Mahlich, M. Miller, Y. Bromberg, Fusion DB: assessing microbial diversity and  
817 environmental preferences via functional similarity networks. *Nucleic acids research* **46**, D535-  
818 D541 (2018).
- 819 33. C. L. Schoch *et al.*, NCBI Taxonomy: a comprehensive update on curation, resources and tools.  
820 *Database (Oxford)* **2020**, (2020).

- 821 34. D. H. Parks *et al.*, GTDB: an ongoing census of bacterial and archaeal diversity through a  
822 phylogenetically consistent, rank normalized and complete genome-based taxonomy. *Nucleic*  
823 *Acids Research* **50**, D785-D794 (2021).
- 824 35. J. Zimmermann, C. Kaleta, S. Waschina, gapseq: informed prediction of bacterial metabolic  
825 pathways and reconstruction of accurate metabolic models. *Genome Biology* **22**, 81 (2021).
- 826 36. H. Wang *et al.*, RAVEN 2.0: A versatile toolbox for metabolic network reconstruction and a  
827 case study on *Streptomyces coelicolor*. *PLOS Computational Biology* **14**, e1006541 (2018).
- 828 37. P. D. Karp *et al.*, Pathway Tools version 19.0 update: software for pathway/genome informatics  
829 and systems biology. *Briefings in Bioinformatics* **17**, 877-890 (2015).
- 830 38. D. Machado, S. Andrejev, M. Tramontano, K. R. Patil, Fast automated reconstruction of  
831 genome-scale metabolic models for microbial species and communities. *Nucleic Acids*  
832 *Research* **46**, 7542-7553 (2018).
- 833 39. J. Bromley, I. Guyon, Y. LeCun, E. Säcker, R. Shah, Signature verification using a " siamese"  
834 time delay neural network. *Advances in neural information processing systems* **6**, (1993).
- 835 40. J. N. Nissen *et al.*, Improved metagenome binning and assembly using deep variational  
836 autoencoders. *Nature Biotechnology* **39**, 555-560 (2021).
- 837 41. S. Pan, C. Zhu, X.-M. Zhao, L. P. Coelho, A deep siamese neural network improves  
838 metagenome-assembled genomes in microbiome datasets across different environments. *Nature*  
839 *Communications* **13**, 2326 (2022).
- 840 42. D. D. Kang *et al.*, MetaBAT 2: an adaptive binning algorithm for robust and efficient genome  
841 reconstruction from metagenome assemblies. *PeerJ* **7**, e7359 (2019).
- 842 43. Y.-W. Wu, B. A. Simmons, S. W. Singer, MaxBin 2.0: an automated binning algorithm to  
843 recover genomes from multiple metagenomic datasets. *Bioinformatics* **32**, 605-607 (2015).
- 844 44. D. A. Benson *et al.*, GenBank. *Nucleic Acids Res* **41**, D36-42 (2013).
- 845 45. E. W. Sayers *et al.*, GenBank. *Nucleic Acids Res* **47**, D94-d99 (2019).
- 846 46. Y. Mahlich, M. Steinegger, B. Rost, Y. Bromberg, HFSP: high speed homology-driven function  
847 annotation of proteins. *Bioinformatics* **34**, i304-i312 (2018).
- 848 47. S. El-Gebali *et al.*, The Pfam protein families database in 2019. *Nucleic Acids Research* **47**,  
849 D427-D432 (2018).
- 850 48. The Gene Ontology resource: enriching a GOld mine. *Nucleic Acids Research* **49**, D325-D334  
851 (2021).
- 852 49. M. Ashburner *et al.*, Gene ontology: tool for the unification of biology. The Gene Ontology  
853 Consortium. *Nat Genet* **25**, 25-29 (2000).
- 854 50. A. Barrera, A. Alastruey-Izquierdo, M. J. Martín, I. Cuesta, J. A. Vizcaíno, Analysis of the  
855 Protein Domain and Domain Architecture Content in Fungi and Its Application in the Search of  
856 New Antifungal Targets. *PLOS Computational Biology* **10**, e1003733 (2014).
- 857 51. E. V. Koonin, Y. I. Wolf, G. P. Karev, The structure of the protein universe and genome  
858 evolution. *Nature* **420**, 218-223 (2002).
- 859 52. M. Itoh, J. C. Nacher, K.-i. Kuma, S. Goto, M. Kanehisa, Evolutionary history and functional  
860 implications of protein domains and their combinations in eukaryotes. *Genome Biology* **8**, R121  
861 (2007).



- 862 53. S. G. Peisajovich, J. E. Garbarino, P. Wei, W. A. Lim, Rapid Diversification of Cell Signaling  
863 Phenotypes by Modular Domain Recombination. *Science* **328**, 368-372 (2010).
- 864 54. J. Mistry *et al.*, Pfam: The protein families database in 2021. *Nucleic Acids Research* **49**, D412-  
865 D419 (2020).
- 866 55. P. Radivojac, Advancing remote homology detection: A step toward understanding and  
867 accurately predicting protein function. *Cell Syst* **13**, 435-437 (2022).
- 868 56. A. Bairoch, The ENZYME database in 2000. *Nucleic Acids Research* **28**, 304-305 (2000).
- 869 57. D. H. Parks *et al.*, A complete domain-to-species taxonomy for Bacteria and Archaea. *Nature*  
870 *Biotechnology*, 1-8 (2020).
- 871 58. R. Rosselló-Mora, R. Amann, The species concept for prokaryotes. *FEMS Microbiology*  
872 *Reviews* **25**, 39-67 (2001).
- 873 59. T. Větrovský, P. Baldrian, The variability of the 16S rRNA gene in bacterial genomes and its  
874 consequences for bacterial community analyses. *PLoS One* **8**, e57923 (2013).
- 875 60. D. H. Parks *et al.*, A standardized bacterial taxonomy based on genome phylogeny substantially  
876 revises the tree of life. *Nature Biotechnology* **36**, 996-1004 (2018).
- 877 61. V. D. Blondel, J.-L. Guillaume, R. Lambiotte, E. Lefebvre, Fast unfolding of communities in  
878 large networks. *Journal of statistical mechanics: theory and experiment* **2008**, P10008 (2008).
- 879 62. M. Pellegrini, E. M. Marcotte, M. J. Thompson, D. Eisenberg, T. O. Yeates, Assigning protein  
880 functions by comparative genome analysis: Protein phylogenetic profiles. *Proceedings of the*  
881 *National Academy of Sciences* **96**, 4285-4288 (1999).
- 882 63. M. Kanehisa, S. Goto, KEGG: kyoto encyclopedia of genes and genomes. *Nucleic Acids Res*  
883 **28**, 27-30 (2000).
- 884 64. M. Kanehisa, Y. Sato, M. Kawashima, KEGG mapping tools for uncovering hidden features in  
885 biological data. *Protein Science* **31**, 47-53 (2022).
- 886 65. D. Chicco, in *Artificial Neural Networks*, H. Cartwright, Ed. (Springer US, New York, NY,  
887 2021), pp. 73-94.
- 888 66. E. Krissinel, On the relationship between sequence and structure similarities in proteomics.  
889 *Bioinformatics* **23**, 717-723 (2007).
- 890 67. B. Rost, Twilight zone of protein sequence alignments. *Protein Engineering, Design and*  
891 *Selection* **12**, 85-94 (1999).
- 892 68. J. Jumper *et al.*, Highly accurate protein structure prediction with AlphaFold. *Nature* **596**, 583-  
893 589 (2021).
- 894 69. M. Baek *et al.*, Accurate prediction of protein structures and interactions using a three-track  
895 neural network. *Science* **373**, 871-876 (2021).
- 896 70. M. van Kempen *et al.*, Foldseek: fast and accurate protein structure search. *bioRxiv*,  
897 2022.2002.2007.479398 (2022).
- 898 71. W. Li, A. Godzik, Cd-hit: a fast program for clustering and comparing large sets of protein or  
899 nucleotide sequences. *Bioinformatics* **22**, 1658-1659 (2006).
- 900 72. L. Fu, B. Niu, Z. Zhu, S. Wu, W. Li, CD-HIT: accelerated for clustering the next-generation  
901 sequencing data. *Bioinformatics* **28**, 3150-3152 (2012).

- 902 73. M. Steinegger, J. Söding, MMseqs2 enables sensitive protein sequence searching for the  
903 analysis of massive data sets. *Nat Biotechnol* **35**, 1026-1028 (2017).
- 904 74. A. Azad, G. A. Pavlopoulos, C. A. Ouzounis, N. C. Kyrpides, A. Buluç, HipMCL: a high-  
905 performance parallel implementation of the Markov clustering algorithm for large-scale  
906 networks. *Nucleic Acids Res* **46**, e33 (2018).
- 907 75. S. M. Van Dongen, (2000).
- 908 76. A. J. Enright, S. Van Dongen, C. A. Ouzounis, An efficient algorithm for large-scale detection  
909 of protein families. *Nucleic Acids Res* **30**, 1575-1584 (2002).
- 910 77. A. Bairoch, R. Apweiler, The SWISS-PROT protein sequence database: its relevance to human  
911 molecular medical research. *J Mol Med (Berl)* **75**, 312-316 (1997).
- 912 78. T. U. Consortium, UniProt: the universal protein knowledgebase in 2021. *Nucleic Acids  
913 Research* **49**, D480-D489 (2020).
- 914 79. F. Madeira *et al.*, The EMBL-EBI search and sequence analysis tools APIs in 2019. *Nucleic  
915 acids research* **47**, W636-W641 (2019).
- 916 80. S. R. Eddy, Accelerated Profile HMM Searches. *PLOS Computational Biology* **7**, e1002195  
917 (2011).
- 918 81. A. Rosenberg, J. Hirschberg, in *Proceedings of the 2007 joint conference on empirical methods  
919 in natural language processing and computational natural language learning (EMNLP-  
920 CoNLL)*. (2007), pp. 410-420.
- 921 82. F. Pedregosa *et al.*, Scikit-learn: Machine learning in Python. *the Journal of machine Learning  
922 research* **12**, 2825-2830 (2011).
- 923 83. J. Sukumaran, M. T. Holder, DendroPy: a Python library for phylogenetic computing.  
924 *Bioinformatics* **26**, 1569-1571 (2010).
- 925 84. F. Menardo *et al.*, Treemmer: a tool to reduce large phylogenetic datasets with minimal loss of  
926 diversity. *BMC Bioinformatics* **19**, 164 (2018).
- 927 85. J. R. Cole *et al.*, Ribosomal Database Project: data and tools for high throughput rRNA analysis.  
928 *Nucleic Acids Res* **42**, D633-642 (2014).
- 929 86. E. P. Nawrocki, S. R. Eddy, Infernal 1.1: 100-fold faster RNA homology searches.  
930 *Bioinformatics* **29**, 2933-2935 (2013).
- 931 87. A. Hoarfrost, A. Aptekmann, G. Farfanuk, Y. Bromberg, Shedding Light on Microbial Dark  
932 Matter with A Universal Language of Life. *bioRxiv*, (2020).
- 933 88. S. Hochreiter, J. Schmidhuber, Long Short-Term Memory. *Neural Computation* **9**, 1735-1780  
934 (1997).
- 935 89. S. K. Burley *et al.*, RCSB Protein Data Bank: powerful new tools for exploring 3D structures  
936 of biological macromolecules for basic and applied research and education in fundamental  
937 biology, biomedicine, biotechnology, bioengineering and energy sciences. *Nucleic Acids  
938 Research* **49**, D437-D451 (2020).
- 939 90. H. M. Berman *et al.*, The Protein Data Bank. *Nucleic Acids Research* **28**, 235-242 (2000).
- 940 91. Y. Zhang, J. Skolnick, Scoring function for automated assessment of protein structure template  
941 quality. *Proteins: Structure, Function, and Bioinformatics* **57**, 702-710 (2004).

942 92. Y. Zhang, J. Skolnick, TM-align: a protein structure alignment algorithm based on the TM-  
943 score. *Nucleic acids research* **33**, 2302-2309 (2005).

944

## 945 **Acknowledgments**

946

947 We want to thank Ariel Aptekmann, Maximilian Miller and Zishou Zheng (all Rutgers  
948 University) for the valuable feedback during the concept phase of the project. Many  
949 thanks to Martin Steinegger (Seoul National University) for assistance with MMSeqs2  
950 and Foldseek. Lastly, we extend our gratitude to everyone in the scientific community  
951 for providing the tools, databases and datasources that were vital in producing this  
952 research.

953

954 **Funding:** This work was supported by:  
955 National Science Foundation CAREER award 1553289 (YB, CZ, PKV, HC, MCP and  
956 YM)

957 NIH (National Institutes of Health) grant R01 GM115486 (YB and YM)

958 Iowa State University's Translational Artificial Intelligence Center (IF)

959

## 960 **Author contributions:**

961 Conceptualization: YM, YB, CZ

962 Methodology: YM, HC, MCP, PKV

963 Investigation: YM, YB, HC, MCP, IF, PR

964 Visualization: YM, HC, MCP

965 Writing—original draft: YM, YB

966 Writing—review & editing: YM, YB, IF, PR, HC, MCP, CZ

967

968 **Competing interests:** The authors declare that they have no competing interests.

969

970 **Data and materials availability:** All data are available in the main text, the  
971 Supplementary Materials or referenced permanent online data repositories: Function  
972 dataset: [10.6084/m9.figshare.21599544](https://doi.org/10.6084/m9.figshare.21599544), Organism similarities :  
973 [10.6084/m9.figshare.21637988](https://doi.org/10.6084/m9.figshare.21637988), Structural similarities:  
974 [10.6084/m9.figshare.21637937](https://doi.org/10.6084/m9.figshare.21637937), Jupyter & R notebooks containing the analysis of  
975 datasets: <https://bitbucket.org/bromberglab/fusion-manuscript-analysis/>, git-repository  
976 containing the code to generate the Fusion functions:  
977 <https://bitbucket.org/bromberglab/fusion-updater/>

978

979

## 980 **Figures**

981

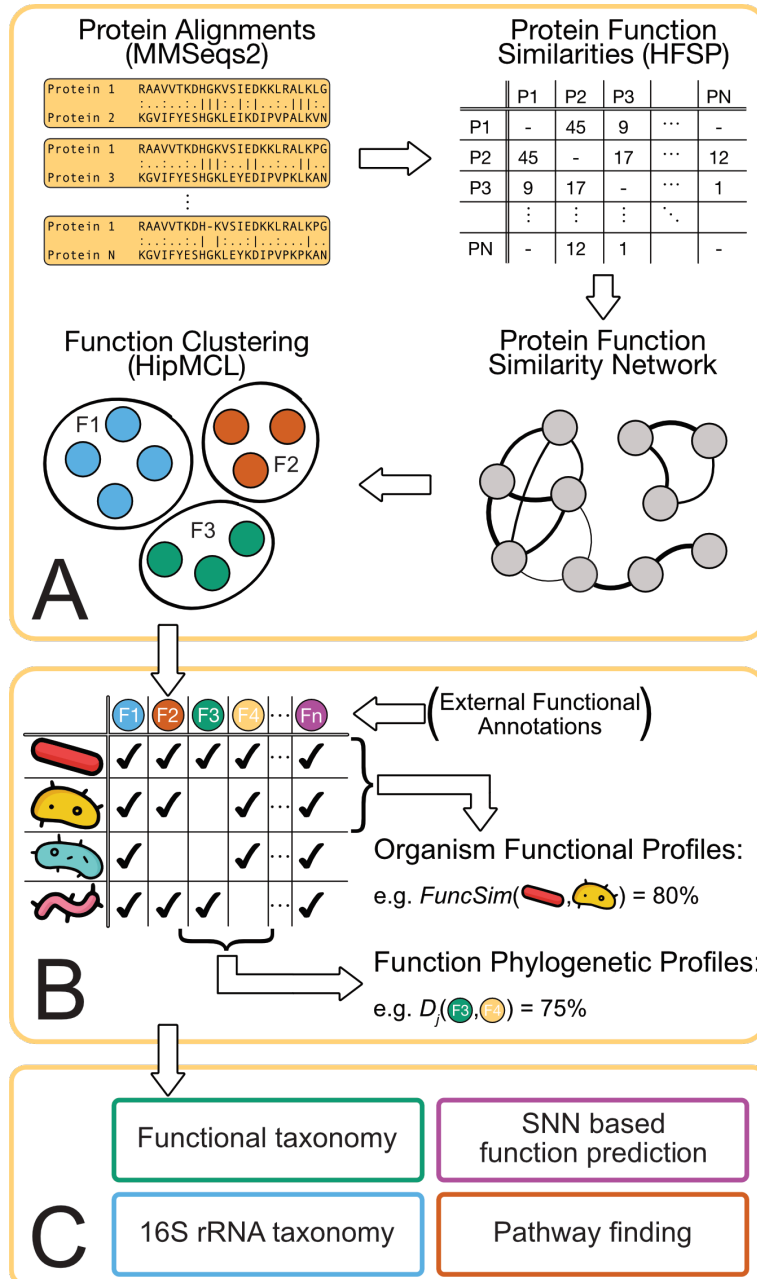

**Fig. 1. Fusion workflow.** (A) Fusion Functions are a result of an all-against-all protein alignment between all ~15.6M proteins in our set. (B) Organism (row-wise) comparisons net the organism functional profile similarities, while column-wise comparisons yield the functional phylogenetic profile similarities. (C) Analyzing organism similarities results in the functional taxonomy and contributes to the 16S rRNA analyses. Pathway finding uses functional profiles, while SNN function prediction relies on protein function annotations.

982  
 983  
 984  
 985  
 986  
 987  
 988  
 989  
 990  
 991



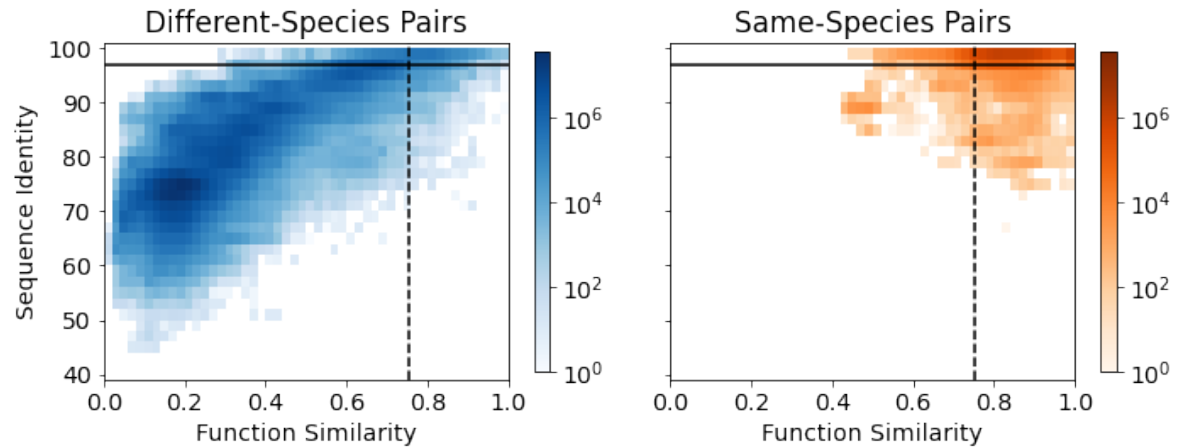

992  
993  
994  
995  
996  
997  
998

**Fig. 2. 16S rRNA identity and functional similarity capture different taxonomic patterns.** Density plots capture the location of pairs of different species (left, blue) and same species (right, orange) organisms in the space defined by the 16S rRNA identity (y-axis) and Fusion similarity (x-axis). Horizontal solid and vertical dashed lines represent the 16S rRNA and Function similarity thresholds of 97% and 75.5%, respectively.

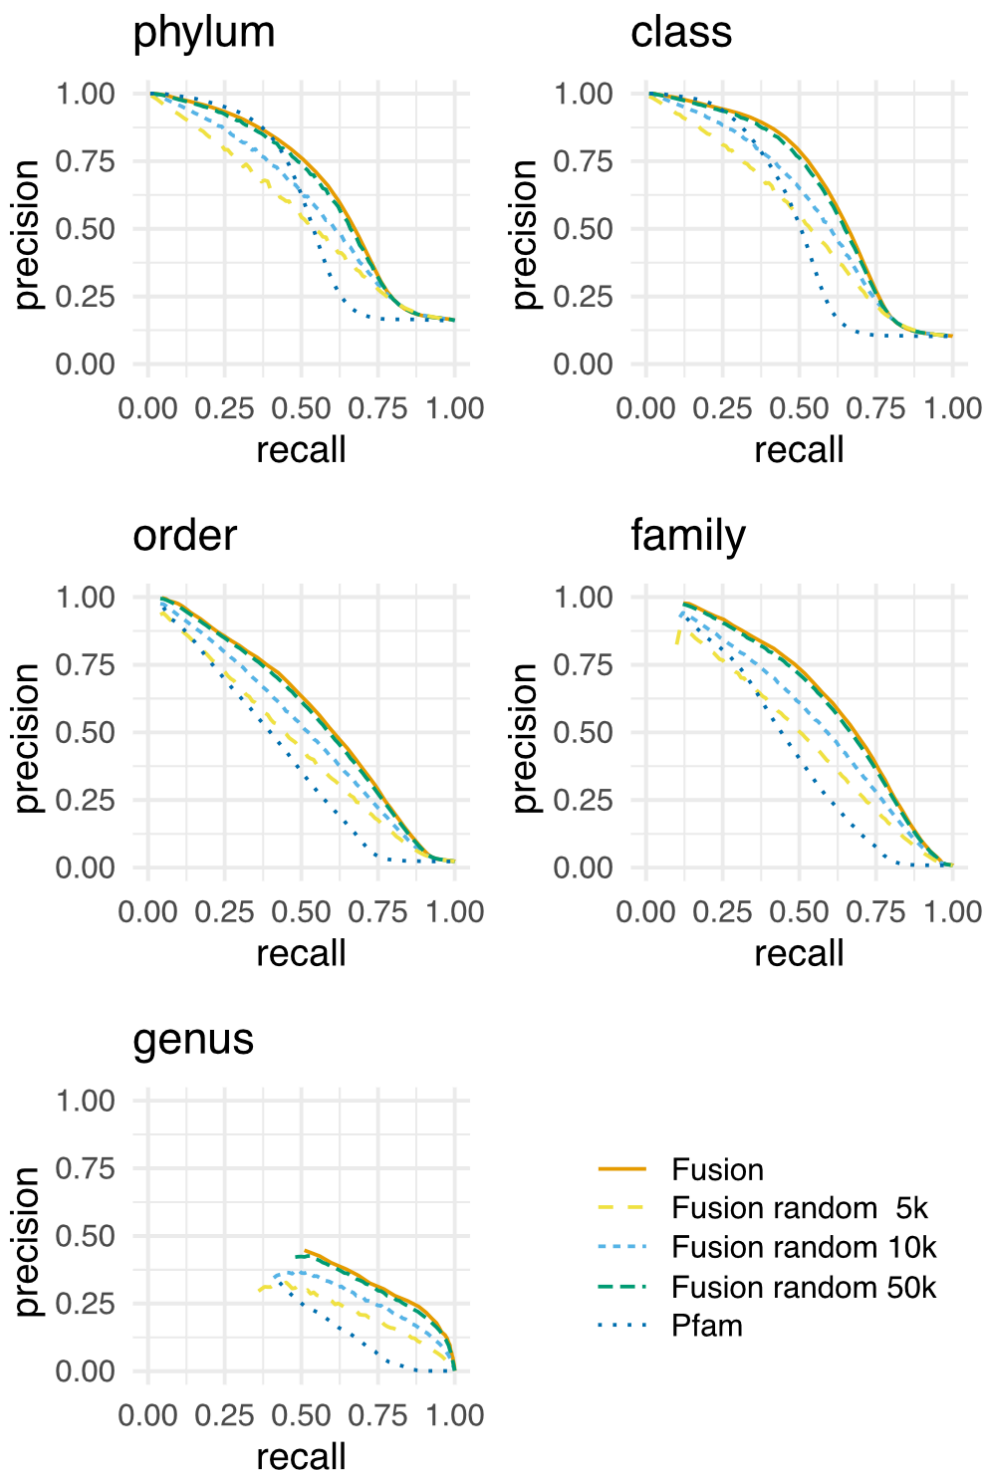

**Fig. 3. Randomly selected Fusion functions identify organism taxonomic relationships.** Each panel reflects the precision (y-axis) at a given recall (x-axis) for correctly identifying two organisms as sharing the same taxonomic rank (panel label). Line color indicates the functional samples. For example, using 5,000 Fusion functions (yellow) outperforms using all of Pfam

999  
1000  
1001  
1002  
1003  
1004

1005  
1006  
1007

(darkblue) for most cutoffs across all panels. Displayed are only precision/recall pairs where predicted positives pairs (TP+FP) make up at least 0.1% of all possible pairs.

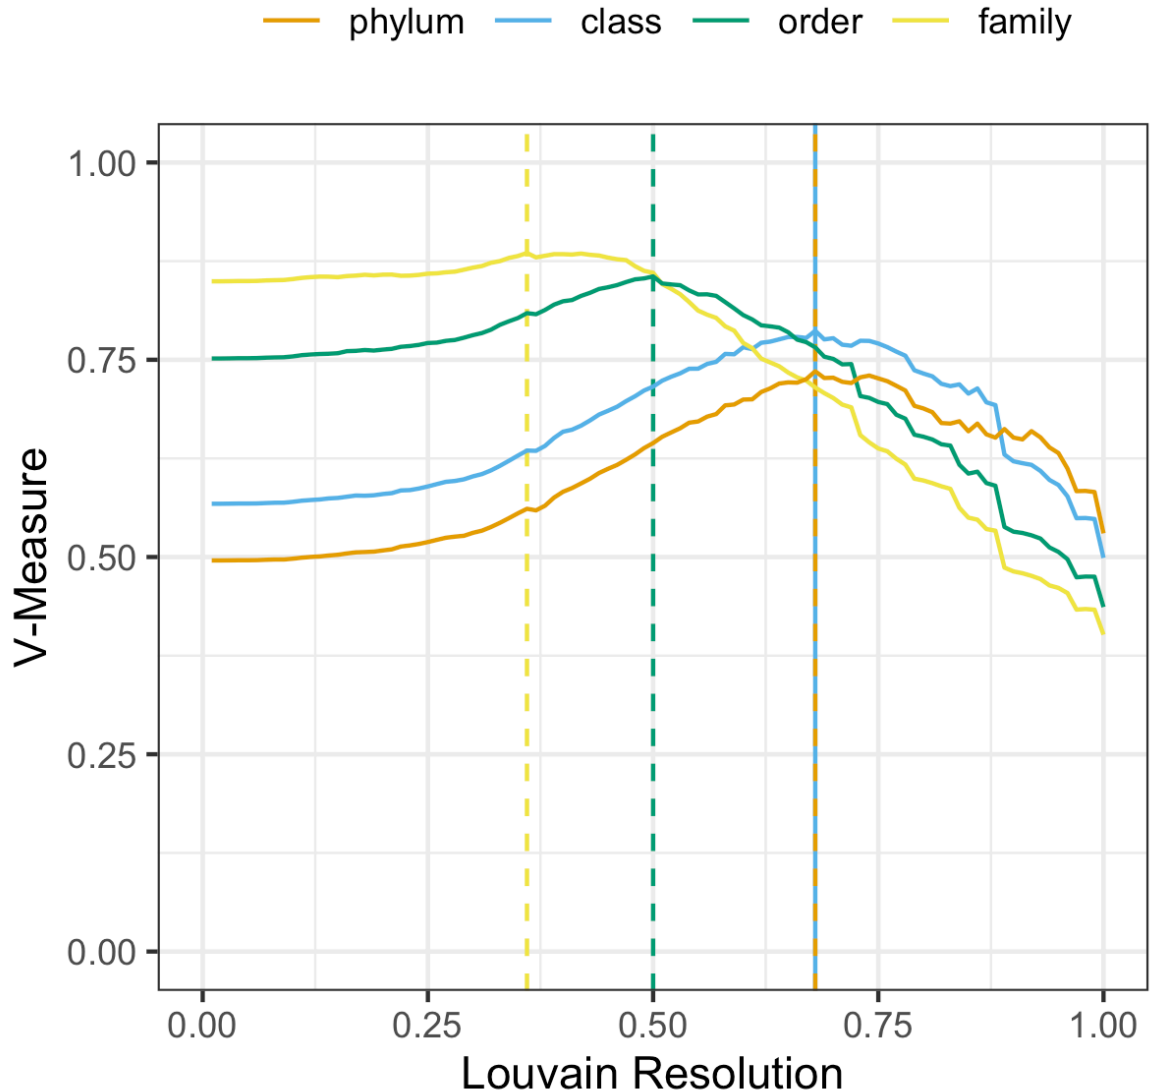

1008  
1009  
1010  
1011  
1012  
1013  
1014  
1015  
1016  
1017  
1018

**Fig 4. Community based organism classification using Fusion functional organism similarities recapitulates established taxonomy.** Choosing different Louvain resolution parameters (x-axis) to establish communities of functionally similar organisms we can optimize the rate (y-axis) at which any two organisms are assigned to be in the same Fusion taxon vs. reference of GTDB-taxonomy assignment. For example, clustering the Fusion organism similarity network at a Louvain resolution parameter of 0.36 yields the best approximation of communities of organisms, corresponding to the family taxonomic level. Thresholds for order, class and phylum are 0.50, 0.68 and 0.68 respectively.

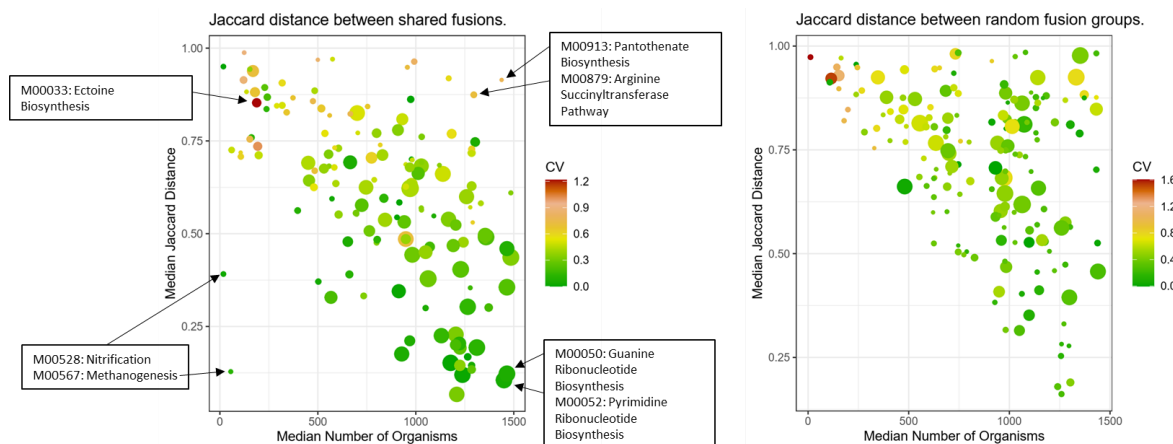

1019

1020

1021

1022

1023

1024

1025

1026

1027

1028

1029

1030

**Fig 5. Median Jaccard distance and Fusion prevalence are inversely correlated.**

For each KEGG (A) and random (B) pathway module (dot in the plot), we calculated the median Jaccard distance between pairs of Fusion functions (y-axis) and the median number of proteomes each function is found in (x-axis). The dot color reflects the coefficient of variation (CV), or standard deviation over the mean for the assembly values, and the dot size captures the number of genomes encoding the given module (size). In (A), modules with low median Jaccard values indicate either ubiquitous biological pathways (M00050, M00052), or pathways unique to specific niche communities (M00528, M00567). Modules with large distances tend to have high CVs, indicating a large difference in the prevalence of shared functions.

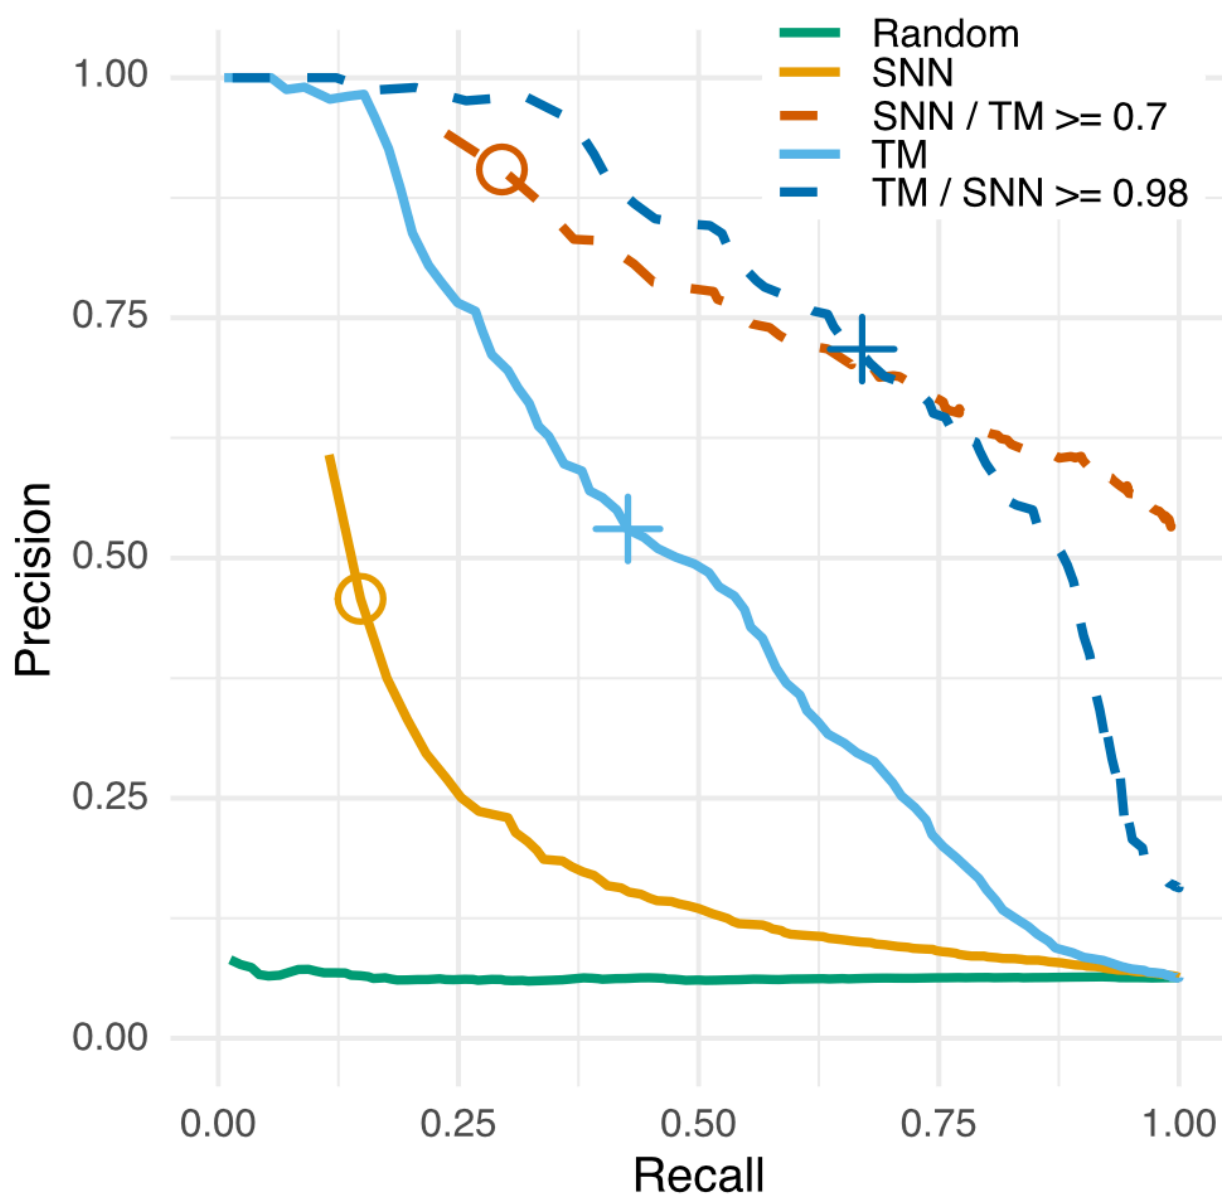

1031

1032

1033

1034

1035

1036

1037

1038

1039

1040

1041

1042

**Fig 6. Combining TM and SNN scores improves annotation of functionally**

**similar proteins.** For proteins with available structures, the TM-score (blue solid line) was a better estimate of protein functional similarity (same EC number) than the SNN-score (orange solid line); even at the high reliability threshold of SNN-score  $\geq 0.98$  (circle), the method attained only 46% precision and 16% recall as compared 53% precision and 43% recall of the TM-score  $\geq 0.7$  (cross). However, the combined SNN & TM-score metrics (dashed lines) were better than either of the methods alone. That is, for a subset of structurally similar proteins (TM  $\geq 0.7$ ) the SNN score (orange dashed line) was a good indicator of functional similarity. Similarly for reliably functionally similar proteins (SNN  $\geq 0.98$ ), the TM-score (blue dashed line) had a



1043  
1044  
1045

significantly higher precision. Note that our dataset is representative of real life and thus, trivially, imbalanced as there are significantly fewer same EC (positive) pairs than different EC (negative) pairs; here, a ratio of  $\sim 1/15$

## Protein Alignments (MMSeqs2)

|           |                            |
|-----------|----------------------------|
| Protein 1 | RAAVVTKDGHGKVSIEDKKLRALKLG |
| Protein 2 | KGVIIFYESHGKLEIKDIPVPALKVN |
| Protein 1 | RAAVVTKDGHGKVSIEDKKLRALKPG |
| Protein 3 | KGVIIFYESHGKLEYDIPVPPKLAN  |
| ⋮         | ⋮                          |
| Protein 1 | RAAVVTKDH-KVSTEDKKLRALKPG  |
| Protein N | KGVIIFYESHGKLEYKDIPVPPKLAN |

## Protein Function Similarities (HFSP)

|    | P1 | P2 | P3 | ⋮ | PN |
|----|----|----|----|---|----|
| P1 | -  | 45 | 9  | ⋮ | -  |
| P2 | 45 | -  | 17 | ⋮ | 12 |
| P3 | 9  | 17 | -  | ⋮ | 1  |
| ⋮  | ⋮  | ⋮  | ⋮  | ⋮ | ⋮  |
| PN | -  | 12 | 1  |   | -  |

## Function Clustering (HipMCL)

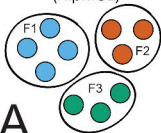

## Protein Function Similarity Network

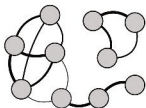

A

|  | F1 | F2 | F3 | F4 | ⋮ | F <sub>n</sub> |
|--|----|----|----|----|---|----------------|
|  | ✓  | ✓  | ✓  | ✓  | ⋮ | ✓              |
|  | ✓  | ✓  |    | ✓  | ⋮ | ✓              |
|  | ✓  |    |    | ✓  | ⋮ | ✓              |
|  | ✓  | ✓  | ✓  |    | ⋮ | ✓              |

(External Functional Annotations)

Organism Functional Profiles:

e.g.  $FuncSim(\text{Red Rod}, \text{Yellow Oval}) = 80\%$

Function Phylogenetic Profiles:

e.g.  $D_j(F_3, F_4) = 75\%$

B

Functional taxonomy

SNN based function prediction

16S rRNA taxonomy

Pathway finding

C

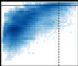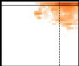

phylum

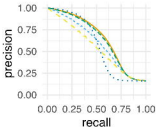

class

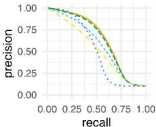

order

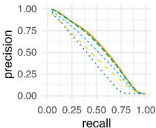

family

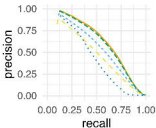

genus

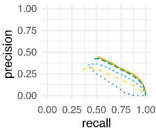

- Fusion
- - - Fusion random 5k
- ... .. Fusion random 10k
- · - · Fusion random 50k
- ... .. Pfam

— phylum — class — order — family

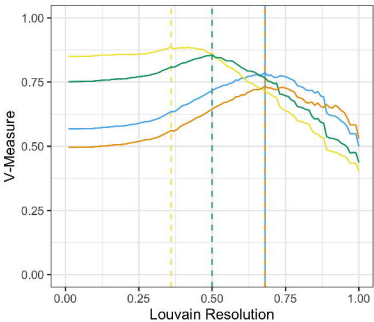





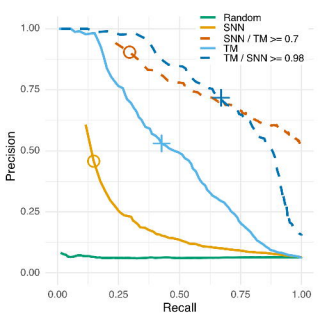

Source: https://www.biorxiv.org/content/10.1101/2022.11.28.518265v1.full.pdf
